# Supplementary material
Source: PubMed Central journal article supplement (PMC2676240)
Supplement: NIHMS105495-supplement-Supporting_Info.pdf [file NIHMS105495-supplement-Supporting_Info.pdf]

## **Supporting Information**

# **Quantitative Geometric Descriptions of the Belt Iron Atoms of the Iron-Molybdenum Cofactor of Nitrogenase and Synthetic Iron(II) Model Complexes**

Javier Vela, Jordi Cirera, Jeremy M. Smith, Rene J. Lachicotte, Christine J.

Flaschenriem, Santiago Alvarez,\* Patrick L. Holland\*

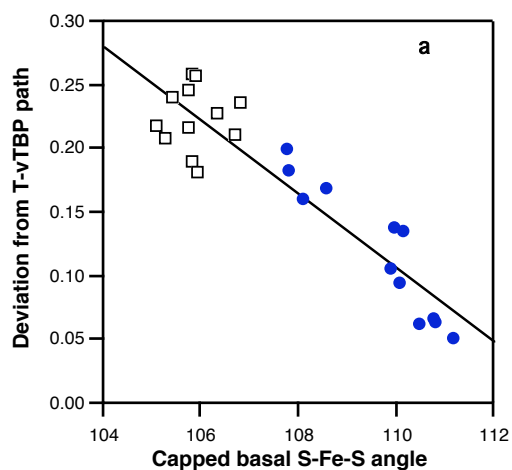

**Figure S1.** Dependence of the deviation from the T-vTBP path on the S-Fe-S bond angle subtended by the capping Mo (blue circles) or Fe (squares) atoms in the FeMo cofactor.

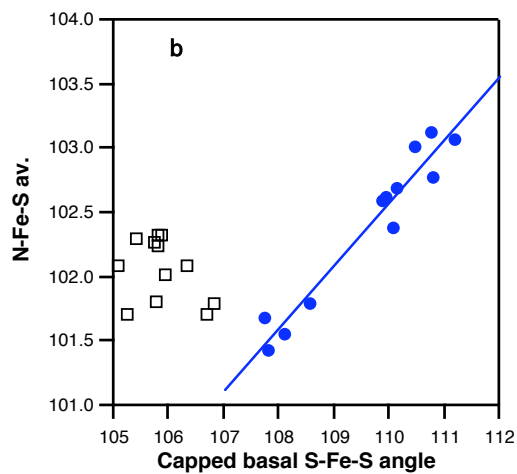

**Figure S2.** Dependence of the average S-Fe-X bond angle  $\alpha$  on the S-Fe-S bond angle subtended by the capping Mo (blue circles) or Fe (squares) atoms in the FeMo cofactor.

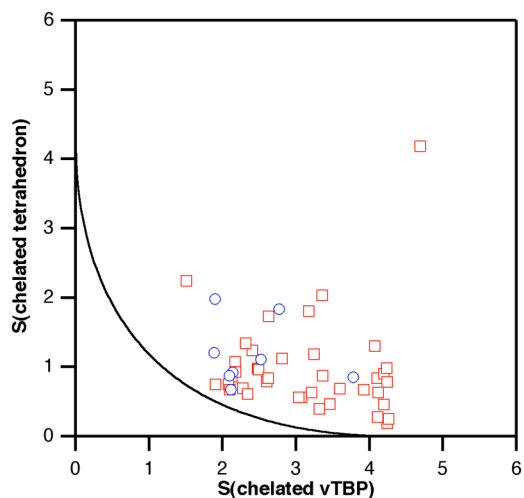

**Figure S3.** Shape map referred to a chelated tetrahedron and a chelated vTBP, in which one bond angle is constrained to be  $95^\circ$ , showing the position of the Fe atoms in diketiminato complexes. Symbols as in Fig. 11.

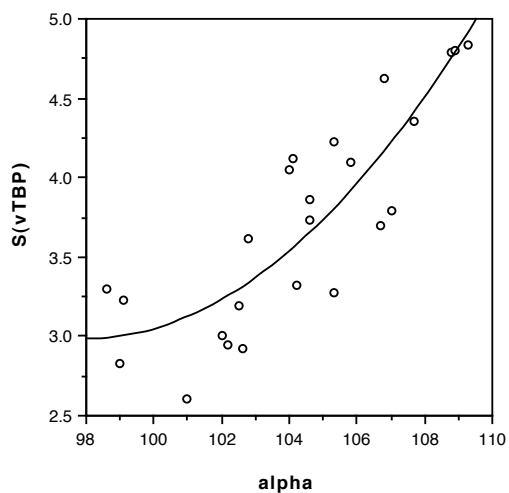

**Figure S4.** Scatterplot of the vTBP shape measures of Fe(II) diketiminato complexes (Table 2) as a function of the average pyramidity angle  $\alpha$  (Scheme 2d).

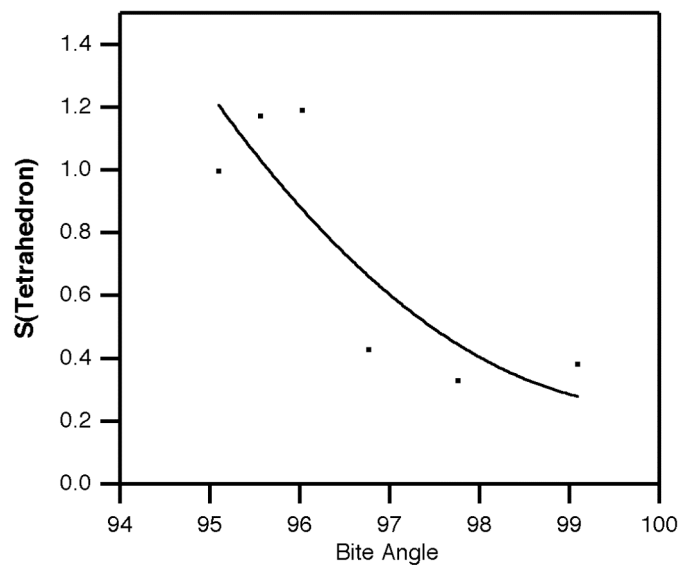

**Figure S5.** Tetrahedral measures of Fe(III) diketiminate complexes represented as a function of the bite angle.

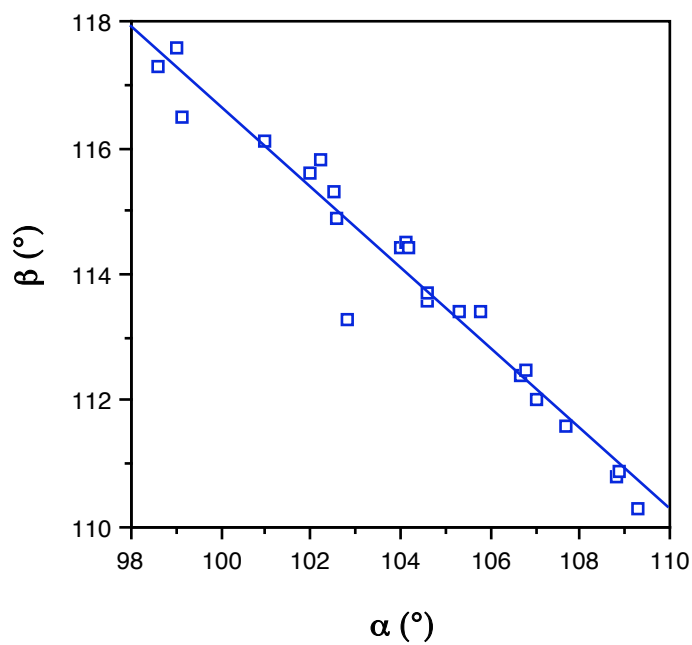

**Figure S6.** Scatterplot of the basal and axial bond angles (Scheme 2b) of Fe(II) diketiminate complexes (Table 2).

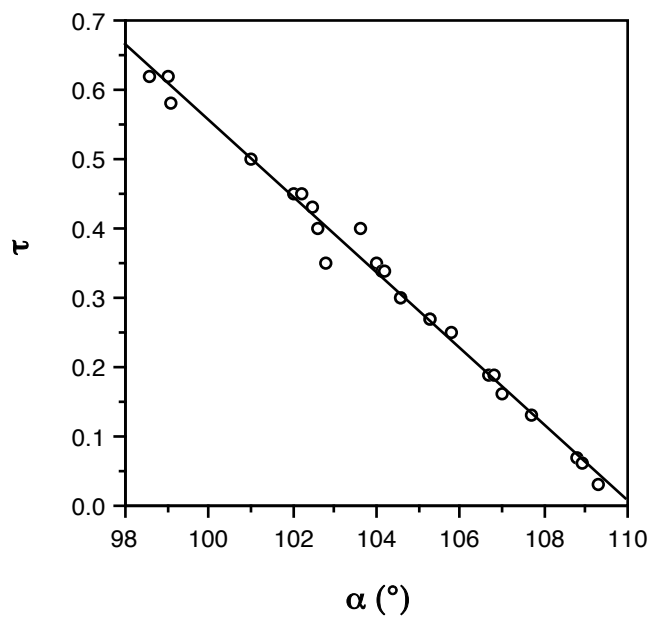

**Figure S7.** Correlation between the parameter  $\tau$  defined in eq. 1 and the average axial ligand-metal-basal ligand bond angle  $\alpha$  (Scheme 2b) of Fe(II) diketiminate complexes (Table 2).

Table S1. Crystal data and structure refinement for 1.

|                                   |                                                                                                                             |
|-----------------------------------|-----------------------------------------------------------------------------------------------------------------------------|
| Identification code               | holjv49                                                                                                                     |
| Empirical formula                 | C38 H59 Fe N3                                                                                                               |
| Formula weight                    | 613.73                                                                                                                      |
| Temperature                       | 193(2) K                                                                                                                    |
| Wavelength                        | 0.71073 Å                                                                                                                   |
| Crystal system, space group       | Monoclinic, P2(1)                                                                                                           |
| Unit cell dimensions              | a = 10.0407(10) Å    alpha = 90 deg.<br>b = 16.3860(16) Å    beta = 108.979(2) deg.<br>c = 11.8742(12) Å    gamma = 90 deg. |
| Volume                            | 1847.4(3) Å <sup>3</sup>                                                                                                    |
| Z, Calculated density             | 2, 1.103 Mg/m <sup>3</sup>                                                                                                  |
| Absorption coefficient            | 0.435 mm <sup>-1</sup>                                                                                                      |
| F(000)                            | 668                                                                                                                         |
| Crystal size                      | 0.50 x 0.50 x 0.45 mm                                                                                                       |
| Theta range for data collection   | 1.81 to 28.26 deg.                                                                                                          |
| Limiting indices                  | -13<=h<=13, -21<=k<=21, -15<=l<=15                                                                                          |
| Reflections collected / unique    | 22406 / 8838 [R(int) = 0.0188]                                                                                              |
| Completeness to theta = 28.26     | 98.8 %                                                                                                                      |
| Absorption correction             | Empirical                                                                                                                   |
| Refinement method                 | Full-matrix least-squares on F <sup>2</sup>                                                                                 |
| Data / restraints / parameters    | 8838 / 1 / 394                                                                                                              |
| Goodness-of-fit on F <sup>2</sup> | 1.035                                                                                                                       |
| Final R indices [I>2sigma(I)]     | R1 = 0.0292, wR2 = 0.0699                                                                                                   |
| R indices (all data)              | R1 = 0.0339, wR2 = 0.0721                                                                                                   |
| Absolute structure parameter      | -0.017(8)                                                                                                                   |
| Largest diff. peak and hole       | 0.214 and -0.196 e.Å <sup>-3</sup>                                                                                          |

Table S2. Atomic coordinates ( $\times 10^4$ ) and equivalent isotropic displacement parameters ( $\text{\AA}^2 \times 10^3$ ) for 1. U(eq) is defined as one third of the trace of the orthogonalized  $U_{ij}$  tensor.

|        | x        | y       | z        | U(eq) |
|--------|----------|---------|----------|-------|
| Fe(1)  | 6460(1)  | 6269(1) | 2390(1)  | 26(1) |
| N(11)  | 6110(1)  | 5140(1) | 1664(1)  | 26(1) |
| N(14)  | 4397(2)  | 6712(1) | 1348(1)  | 35(1) |
| N(21)  | 5781(1)  | 5949(1) | 3759(1)  | 26(1) |
| C(11)  | 4293(2)  | 5179(1) | 4675(2)  | 38(1) |
| C(12)  | 6908(2)  | 4892(1) | 906(1)   | 29(1) |
| C(13)  | 6220(2)  | 6460(1) | 4801(1)  | 28(1) |
| C(14)  | 3214(2)  | 6594(1) | 975(1)   | 35(1) |
| C(15)  | 8022(2)  | 7013(1) | 2236(2)  | 36(1) |
| C(21)  | 4925(2)  | 5322(1) | 3694(1)  | 27(1) |
| C(22)  | 6453(2)  | 5101(1) | -306(1)  | 33(1) |
| C(23)  | 5341(2)  | 7087(1) | 4967(1)  | 33(1) |
| C(24)  | 1689(2)  | 6410(1) | 488(2)   | 41(1) |
| C(25)  | 7833(2)  | 7937(1) | 2339(2)  | 36(1) |
| C(31)  | 4564(2)  | 4752(1) | 2752(1)  | 30(1) |
| C(32)  | 7292(2)  | 4874(1) | -988(2)  | 41(1) |
| C(33)  | 5845(2)  | 7587(1) | 5972(2)  | 41(1) |
| C(34)  | 1196(2)  | 6084(2) | 1490(2)  | 58(1) |
| C(35)  | 8077(2)  | 8188(1) | 3621(2)  | 50(1) |
| C(41)  | 5183(2)  | 4627(1) | 1857(1)  | 28(1) |
| C(42)  | 8529(2)  | 4450(1) | -499(2)  | 46(1) |
| C(43)  | 7165(2)  | 7476(1) | 6782(2)  | 45(1) |
| C(44)  | 891(3)   | 7195(2) | -20(3)   | 84(1) |
| C(45)  | 8785(2)  | 8438(1) | 1824(2)  | 52(1) |
| C(51)  | 4751(2)  | 3863(1) | 1114(2)  | 41(1) |
| C(52)  | 8970(2)  | 4259(1) | 701(2)   | 42(1) |
| C(53)  | 8032(2)  | 6870(1) | 6598(2)  | 41(1) |
| C(54)  | 1481(3)  | 5763(2) | -480(2)  | 77(1) |
| C(62)  | 8176(2)  | 4474(1) | 1423(2)  | 35(1) |
| C(63)  | 7598(2)  | 6362(1) | 5608(1)  | 31(1) |
| C(72)  | 5086(2)  | 5556(1) | -896(2)  | 39(1) |
| C(73)  | 3894(2)  | 7263(1) | 4072(2)  | 40(1) |
| C(82)  | 5355(3)  | 6431(1) | -1204(2) | 67(1) |
| C(83)  | 3930(3)  | 8046(1) | 3378(2)  | 57(1) |
| C(92)  | 4142(2)  | 5107(2) | -1996(2) | 60(1) |
| C(93)  | 2750(2)  | 7311(2) | 4668(2)  | 65(1) |
| C(102) | 8715(2)  | 4250(1) | 2746(2)  | 41(1) |
| C(103) | 8573(2)  | 5708(1) | 5402(2)  | 36(1) |
| C(112) | 10177(2) | 4577(2) | 3368(2)  | 61(1) |
| C(113) | 8352(3)  | 4890(2) | 5912(3)  | 71(1) |
| C(122) | 8682(3)  | 3329(2) | 2940(2)  | 65(1) |
| C(123) | 10129(2) | 5969(2) | 5861(2)  | 64(1) |

Table S3. Bond lengths [Å] and angles [deg] for 1.

---

|                   |            |
|-------------------|------------|
| Fe(1)-N(11)       | 2.0230(12) |
| Fe(1)-N(21)       | 2.0262(12) |
| Fe(1)-C(15)       | 2.0400(16) |
| Fe(1)-N(14)       | 2.1634(15) |
| N(11)-C(41)       | 1.3283(19) |
| N(11)-C(12)       | 1.4436(19) |
| N(14)-C(14)       | 1.141(2)   |
| N(21)-C(21)       | 1.3250(19) |
| N(21)-C(13)       | 1.4393(19) |
| C(11)-C(21)       | 1.516(2)   |
| C(12)-C(62)       | 1.399(2)   |
| C(12)-C(22)       | 1.404(2)   |
| C(13)-C(23)       | 1.409(2)   |
| C(13)-C(63)       | 1.413(2)   |
| C(14)-C(24)       | 1.482(2)   |
| C(15)-C(25)       | 1.536(2)   |
| C(21)-C(31)       | 1.411(2)   |
| C(22)-C(32)       | 1.395(2)   |
| C(22)-C(72)       | 1.518(3)   |
| C(23)-C(33)       | 1.400(2)   |
| C(23)-C(73)       | 1.523(2)   |
| C(24)-C(34)       | 1.526(3)   |
| C(24)-C(54)       | 1.527(3)   |
| C(24)-C(44)       | 1.532(3)   |
| C(25)-C(35)       | 1.518(3)   |
| C(25)-C(45)       | 1.531(2)   |
| C(31)-C(41)       | 1.410(2)   |
| C(32)-C(42)       | 1.375(3)   |
| C(33)-C(43)       | 1.373(3)   |
| C(41)-C(51)       | 1.512(2)   |
| C(42)-C(52)       | 1.383(3)   |
| C(43)-C(53)       | 1.384(3)   |
| C(52)-C(62)       | 1.393(2)   |
| C(53)-C(63)       | 1.391(2)   |
| C(62)-C(102)      | 1.531(2)   |
| C(63)-C(103)      | 1.524(2)   |
| C(72)-C(82)       | 1.526(3)   |
| C(72)-C(92)       | 1.530(3)   |
| C(73)-C(83)       | 1.532(3)   |
| C(73)-C(93)       | 1.535(3)   |
| C(102)-C(112)     | 1.510(3)   |
| C(102)-C(122)     | 1.529(3)   |
| C(103)-C(113)     | 1.517(3)   |
| C(103)-C(123)     | 1.538(3)   |
| <br>              |            |
| N(11)-Fe(1)-N(21) | 92.74(5)   |
| N(11)-Fe(1)-C(15) | 122.69(6)  |
| N(21)-Fe(1)-C(15) | 134.09(6)  |
| N(11)-Fe(1)-N(14) | 93.51(5)   |
| N(21)-Fe(1)-N(14) | 92.07(5)   |
| C(15)-Fe(1)-N(14) | 111.67(6)  |
| C(41)-N(11)-C(12) | 119.47(12) |
| C(41)-N(11)-Fe(1) | 122.64(10) |
| C(12)-N(11)-Fe(1) | 117.90(9)  |
| C(14)-N(14)-Fe(1) | 147.96(13) |
| C(21)-N(21)-C(13) | 120.79(12) |
| C(21)-N(21)-Fe(1) | 122.38(10) |
| C(13)-N(21)-Fe(1) | 116.77(9)  |
| C(62)-C(12)-C(22) | 120.97(14) |
| C(62)-C(12)-N(11) | 118.37(14) |
| C(22)-C(12)-N(11) | 120.60(14) |



|                      |            |
|----------------------|------------|
| C(23)-C(13)-C(63)    | 120.51(14) |
| C(23)-C(13)-N(21)    | 120.93(13) |
| C(63)-C(13)-N(21)    | 118.37(13) |
| N(14)-C(14)-C(24)    | 177.94(18) |
| C(25)-C(15)-Fe(1)    | 117.60(11) |
| N(21)-C(21)-C(31)    | 123.58(13) |
| N(21)-C(21)-C(11)    | 120.11(13) |
| C(31)-C(21)-C(11)    | 116.30(13) |
| C(32)-C(22)-C(12)    | 118.28(16) |
| C(32)-C(22)-C(72)    | 119.29(15) |
| C(12)-C(22)-C(72)    | 122.43(14) |
| C(33)-C(23)-C(13)    | 118.50(15) |
| C(33)-C(23)-C(73)    | 118.84(15) |
| C(13)-C(23)-C(73)    | 122.62(14) |
| C(14)-C(24)-C(34)    | 108.87(14) |
| C(14)-C(24)-C(54)    | 107.82(15) |
| C(34)-C(24)-C(54)    | 110.16(19) |
| C(14)-C(24)-C(44)    | 108.89(18) |
| C(34)-C(24)-C(44)    | 109.92(19) |
| C(54)-C(24)-C(44)    | 111.1(2)   |
| C(35)-C(25)-C(45)    | 109.69(16) |
| C(35)-C(25)-C(15)    | 111.27(15) |
| C(45)-C(25)-C(15)    | 112.82(15) |
| C(41)-C(31)-C(21)    | 129.18(14) |
| C(42)-C(32)-C(22)    | 121.47(17) |
| C(43)-C(33)-C(23)    | 121.22(16) |
| N(11)-C(41)-C(31)    | 122.94(13) |
| N(11)-C(41)-C(51)    | 120.47(14) |
| C(31)-C(41)-C(51)    | 116.59(14) |
| C(32)-C(42)-C(52)    | 119.50(16) |
| C(33)-C(43)-C(53)    | 119.88(16) |
| C(42)-C(52)-C(62)    | 121.33(17) |
| C(43)-C(53)-C(63)    | 121.53(16) |
| C(52)-C(62)-C(12)    | 118.44(16) |
| C(52)-C(62)-C(102)   | 119.23(16) |
| C(12)-C(62)-C(102)   | 122.33(14) |
| C(53)-C(63)-C(13)    | 118.28(15) |
| C(53)-C(63)-C(103)   | 121.03(14) |
| C(13)-C(63)-C(103)   | 120.68(14) |
| C(22)-C(72)-C(82)    | 111.59(17) |
| C(22)-C(72)-C(92)    | 111.99(16) |
| C(82)-C(72)-C(92)    | 110.83(18) |
| C(23)-C(73)-C(83)    | 110.49(16) |
| C(23)-C(73)-C(93)    | 112.04(17) |
| C(83)-C(73)-C(93)    | 110.95(18) |
| C(112)-C(102)-C(122) | 109.96(18) |
| C(112)-C(102)-C(62)  | 112.33(16) |
| C(122)-C(102)-C(62)  | 111.95(17) |
| C(113)-C(103)-C(63)  | 111.83(15) |
| C(113)-C(103)-C(123) | 111.58(18) |
| C(63)-C(103)-C(123)  | 112.33(15) |

---

Table S4. Anisotropic displacement parameters ( $\text{\AA}^2 \times 10^3$ ) for 1.  
The anisotropic displacement factor exponent takes the form:  
 $-2 \pi^2 [ h^2 a^{*2} U_{11} + \dots + 2 h k a^* b^* U_{12} ]$

|        | U11   | U22    | U33    | U23    | U13   | U12    |
|--------|-------|--------|--------|--------|-------|--------|
| Fe(1)  | 31(1) | 23(1)  | 28(1)  | -2(1)  | 14(1) | -4(1)  |
| N(11)  | 33(1) | 24(1)  | 26(1)  | -2(1)  | 13(1) | -1(1)  |
| N(14)  | 42(1) | 31(1)  | 33(1)  | 2(1)   | 15(1) | 2(1)   |
| N(21)  | 27(1) | 28(1)  | 23(1)  | -1(1)  | 9(1)  | 1(1)   |
| C(11)  | 44(1) | 40(1)  | 37(1)  | 0(1)   | 22(1) | -7(1)  |
| C(12)  | 36(1) | 22(1)  | 33(1)  | -4(1)  | 17(1) | -5(1)  |
| C(13)  | 32(1) | 31(1)  | 25(1)  | -1(1)  | 14(1) | -4(1)  |
| C(14)  | 43(1) | 33(1)  | 29(1)  | 2(1)   | 13(1) | 4(1)   |
| C(15)  | 35(1) | 33(1)  | 45(1)  | -1(1)  | 20(1) | -5(1)  |
| C(21)  | 27(1) | 29(1)  | 27(1)  | 3(1)   | 11(1) | 1(1)   |
| C(22)  | 43(1) | 30(1)  | 31(1)  | -3(1)  | 17(1) | -6(1)  |
| C(23)  | 34(1) | 35(1)  | 31(1)  | -4(1)  | 15(1) | -3(1)  |
| C(24)  | 36(1) | 46(1)  | 37(1)  | 0(1)   | 7(1)  | 4(1)   |
| C(25)  | 32(1) | 33(1)  | 42(1)  | 2(1)   | 12(1) | -4(1)  |
| C(31)  | 32(1) | 27(1)  | 32(1)  | 0(1)   | 14(1) | -5(1)  |
| C(32)  | 53(1) | 47(1)  | 31(1)  | -5(1)  | 22(1) | -4(1)  |
| C(33)  | 49(1) | 38(1)  | 41(1)  | -12(1) | 21(1) | -2(1)  |
| C(34)  | 41(1) | 83(2)  | 51(1)  | 3(1)   | 17(1) | -4(1)  |
| C(35)  | 61(1) | 40(1)  | 52(1)  | -6(1)  | 20(1) | -10(1) |
| C(41)  | 32(1) | 24(1)  | 27(1)  | 0(1)   | 9(1)  | -1(1)  |
| C(42)  | 53(1) | 49(1)  | 47(1)  | -12(1) | 32(1) | -2(1)  |
| C(43)  | 54(1) | 47(1)  | 34(1)  | -16(1) | 15(1) | -10(1) |
| C(44)  | 54(1) | 81(2)  | 102(2) | 35(2)  | 4(1)  | 19(1)  |
| C(45)  | 52(1) | 44(1)  | 65(1)  | 7(1)   | 23(1) | -11(1) |
| C(51)  | 56(1) | 31(1)  | 43(1)  | -10(1) | 24(1) | -13(1) |
| C(52)  | 43(1) | 40(1)  | 49(1)  | -8(1)  | 22(1) | 4(1)   |
| C(53)  | 41(1) | 49(1)  | 30(1)  | -6(1)  | 7(1)  | -6(1)  |
| C(54)  | 50(1) | 113(2) | 71(2)  | -44(2) | 25(1) | -26(1) |
| C(62)  | 43(1) | 29(1)  | 37(1)  | -3(1)  | 18(1) | 1(1)   |
| C(63)  | 34(1) | 33(1)  | 26(1)  | 0(1)   | 11(1) | -1(1)  |
| C(72)  | 49(1) | 42(1)  | 30(1)  | 1(1)   | 17(1) | 2(1)   |
| C(73)  | 37(1) | 40(1)  | 44(1)  | -9(1)  | 14(1) | 7(1)   |
| C(82)  | 79(2) | 49(2)  | 74(1)  | 23(1)  | 27(1) | 10(1)  |
| C(83)  | 64(1) | 43(1)  | 54(1)  | -3(1)  | 6(1)  | 16(1)  |
| C(92)  | 54(1) | 84(2)  | 37(1)  | -10(1) | 9(1)  | 4(1)   |
| C(93)  | 44(1) | 84(2)  | 71(2)  | -20(1) | 26(1) | 9(1)   |
| C(102) | 45(1) | 44(1)  | 39(1)  | 3(1)   | 19(1) | 13(1)  |
| C(103) | 31(1) | 44(1)  | 30(1)  | 1(1)   | 7(1)  | 4(1)   |
| C(112) | 63(1) | 71(2)  | 44(1)  | 3(1)   | 11(1) | -2(1)  |
| C(113) | 78(2) | 52(1)  | 94(2)  | 28(1)  | 46(1) | 28(1)  |
| C(122) | 79(2) | 55(1)  | 61(1)  | 18(1)  | 22(1) | 2(1)   |
| C(123) | 34(1) | 88(2)  | 67(1)  | -22(1) | 11(1) | 1(1)   |

Table S5. Crystal data and structure refinement for 2.

|                                   |                                                                                                                             |
|-----------------------------------|-----------------------------------------------------------------------------------------------------------------------------|
| Identification code               | holjv54                                                                                                                     |
| Empirical formula                 | C <sub>39</sub> H <sub>61</sub> Fe N <sub>3</sub>                                                                           |
| Formula weight                    | 627.76                                                                                                                      |
| Temperature                       | 193(2) K                                                                                                                    |
| Wavelength                        | 0.71073 Å                                                                                                                   |
| Crystal system, space group       | Monoclinic, P2(1)                                                                                                           |
| Unit cell dimensions              | a = 10.3029(7) Å    alpha = 90 deg.<br>b = 16.3575(11) Å    beta = 104.8300(10) deg.<br>c = 11.8844(8) Å    gamma = 90 deg. |
| Volume                            | 1936.2(2) Å <sup>3</sup>                                                                                                    |
| Z, Calculated density             | 2, 1.077 Mg/m <sup>3</sup>                                                                                                  |
| Absorption coefficient            | 0.417 mm <sup>-1</sup>                                                                                                      |
| F(000)                            | 684                                                                                                                         |
| Crystal size                      | 0.50 x 0.50 x 0.40 mm                                                                                                       |
| Theta range for data collection   | 1.77 to 28.29 deg.                                                                                                          |
| Limiting indices                  | -13<=h<=13, -21<=k<=21, -15<=l<=15                                                                                          |
| Reflections collected / unique    | 23593 / 9300 [R(int) = 0.0202]                                                                                              |
| Completeness to theta = 28.29     | 98.8 %                                                                                                                      |
| Absorption correction             | Empirical                                                                                                                   |
| Refinement method                 | Full-matrix least-squares on F <sup>2</sup>                                                                                 |
| Data / restraints / parameters    | 9300 / 1 / 404                                                                                                              |
| Goodness-of-fit on F <sup>2</sup> | 1.041                                                                                                                       |
| Final R indices [I>2sigma(I)]     | R1 = 0.0315, wR2 = 0.0758                                                                                                   |
| R indices (all data)              | R1 = 0.0349, wR2 = 0.0772                                                                                                   |
| Absolute structure parameter      | 0.029(8)                                                                                                                    |
| Largest diff. peak and hole       | 0.282 and -0.226 e.Å <sup>-3</sup>                                                                                          |

Table S6. Atomic coordinates ( $\times 10^4$ ) and equivalent isotropic displacement parameters ( $\text{\AA}^2 \times 10^3$ ) for 2. U(eq) is defined as one third of the trace of the orthogonalized  $U_{ij}$  tensor.

|        | x        | y       | z        | U(eq)  |
|--------|----------|---------|----------|--------|
| Fe(1)  | 8290(1)  | 6511(1) | 7529(1)  | 28(1)  |
| N(11)  | 9098(1)  | 6190(1) | 6204(1)  | 27(1)  |
| N(15)  | 10208(2) | 6873(1) | 8621(1)  | 41(1)  |
| N(21)  | 8404(1)  | 5354(1) | 8159(1)  | 31(1)  |
| C(11)  | 10575(2) | 5358(1) | 5308(2)  | 42(1)  |
| C(12)  | 8857(1)  | 6736(1) | 5221(1)  | 29(1)  |
| C(13)  | 7483(2)  | 5094(1) | 8820(2)  | 38(1)  |
| C(14)  | 6658(2)  | 7238(1) | 7500(2)  | 37(1)  |
| C(15)  | 11315(2) | 6792(1) | 9089(2)  | 42(1)  |
| C(21)  | 9868(1)  | 5537(1) | 6257(1)  | 29(1)  |
| C(22)  | 9822(2)  | 7316(1) | 5102(1)  | 35(1)  |
| C(23)  | 6255(2)  | 4743(1) | 8228(2)  | 44(1)  |
| C(24)  | 6774(2)  | 8174(1) | 7556(1)  | 38(1)  |
| C(25)  | 12746(2) | 6659(1) | 9696(2)  | 55(1)  |
| C(31)  | 10055(2) | 4951(1) | 7150(1)  | 32(1)  |
| C(32)  | 9492(2)  | 7857(1) | 4165(2)  | 43(1)  |
| C(33)  | 5361(2)  | 4488(1) | 8865(2)  | 59(1)  |
| C(34)  | 7359(2)  | 8485(1) | 6583(2)  | 58(1)  |
| C(35)  | 13499(2) | 6476(3) | 8767(2)  | 85(1)  |
| C(41)  | 9311(2)  | 4824(1) | 7971(1)  | 31(1)  |
| C(42)  | 8266(2)  | 7835(1) | 3377(2)  | 46(1)  |
| C(43)  | 5672(3)  | 4601(2) | 10058(2) | 69(1)  |
| C(44)  | 7663(2)  | 8434(1) | 8737(2)  | 63(1)  |
| C(45)  | 12833(3) | 5922(2) | 10502(3) | 85(1)  |
| C(51)  | 9554(2)  | 4029(1) | 8645(2)  | 45(1)  |
| C(52)  | 7313(2)  | 7271(1) | 3503(1)  | 41(1)  |
| C(53)  | 6847(3)  | 4959(2) | 10622(2) | 68(1)  |
| C(54)  | 5392(2)  | 8569(1) | 7417(2)  | 55(1)  |
| C(55)  | 13257(4) | 7437(2) | 10369(4) | 144(2) |
| C(62)  | 7576(2)  | 6716(1) | 4420(1)  | 32(1)  |
| C(63)  | 7800(2)  | 5220(1) | 10028(2) | 49(1)  |
| C(72)  | 11196(2) | 7378(1) | 5969(2)  | 41(1)  |
| C(73)  | 5874(2)  | 4614(1) | 6924(2)  | 45(1)  |
| C(82)  | 11337(2) | 8179(1) | 6652(2)  | 54(1)  |
| C(83)  | 4493(2)  | 4970(2) | 6344(2)  | 70(1)  |
| C(92)  | 12345(2) | 7300(2) | 5355(2)  | 61(1)  |
| C(93)  | 5922(3)  | 3716(2) | 6612(2)  | 73(1)  |
| C(102) | 6528(2)  | 6096(1) | 4551(1)  | 37(1)  |
| C(103) | 9090(2)  | 5627(1) | 10676(2) | 59(1)  |
| C(112) | 6828(2)  | 5249(1) | 4139(2)  | 61(1)  |
| C(113) | 8841(3)  | 6517(2) | 10958(2) | 94(1)  |
| C(122) | 5088(2)  | 6358(2) | 3959(2)  | 67(1)  |
| C(123) | 9793(4)  | 5160(2) | 11794(2) | 95(1)  |

Table S7. Bond lengths [Å] and angles [deg] for 2.

---

|                   |            |
|-------------------|------------|
| Fe(1)-N(21)       | 2.0269(13) |
| Fe(1)-N(11)       | 2.0294(12) |
| Fe(1)-C(14)       | 2.0526(16) |
| Fe(1)-N(15)       | 2.1513(15) |
| N(11)-C(21)       | 1.3227(19) |
| N(11)-C(12)       | 1.4407(19) |
| N(15)-C(15)       | 1.142(2)   |
| N(21)-C(41)       | 1.3360(19) |
| N(21)-C(13)       | 1.443(2)   |
| C(11)-C(21)       | 1.519(2)   |
| C(12)-C(22)       | 1.406(2)   |
| C(12)-C(62)       | 1.416(2)   |
| C(13)-C(23)       | 1.403(3)   |
| C(13)-C(63)       | 1.404(2)   |
| C(14)-C(24)       | 1.536(2)   |
| C(15)-C(25)       | 1.482(3)   |
| C(21)-C(31)       | 1.406(2)   |
| C(22)-C(32)       | 1.395(2)   |
| C(22)-C(72)       | 1.526(2)   |
| C(23)-C(33)       | 1.398(2)   |
| C(23)-C(73)       | 1.513(3)   |
| C(24)-C(34)       | 1.521(3)   |
| C(24)-C(44)       | 1.527(2)   |
| C(24)-C(54)       | 1.533(2)   |
| C(25)-C(55)       | 1.524(4)   |
| C(25)-C(45)       | 1.528(4)   |
| C(25)-C(35)       | 1.533(3)   |
| C(31)-C(41)       | 1.402(2)   |
| C(32)-C(42)       | 1.367(3)   |
| C(33)-C(43)       | 1.384(4)   |
| C(41)-C(51)       | 1.513(2)   |
| C(42)-C(52)       | 1.383(3)   |
| C(43)-C(53)       | 1.357(4)   |
| C(52)-C(62)       | 1.391(2)   |
| C(53)-C(63)       | 1.414(3)   |
| C(62)-C(102)      | 1.519(2)   |
| C(63)-C(103)      | 1.509(3)   |
| C(72)-C(82)       | 1.529(3)   |
| C(72)-C(92)       | 1.546(3)   |
| C(73)-C(93)       | 1.519(3)   |
| C(73)-C(83)       | 1.528(3)   |
| C(102)-C(112)     | 1.527(3)   |
| C(102)-C(122)     | 1.532(3)   |
| C(103)-C(113)     | 1.530(4)   |
| C(103)-C(123)     | 1.543(3)   |
| N(21)-Fe(1)-N(11) | 92.81(5)   |
| N(21)-Fe(1)-C(14) | 121.14(6)  |
| N(11)-Fe(1)-C(14) | 129.30(6)  |
| N(21)-Fe(1)-N(15) | 94.39(6)   |
| N(11)-Fe(1)-N(15) | 92.48(5)   |
| C(14)-Fe(1)-N(15) | 118.21(6)  |
| C(21)-N(11)-C(12) | 121.03(12) |
| C(21)-N(11)-Fe(1) | 122.16(10) |
| C(12)-N(11)-Fe(1) | 116.71(9)  |
| C(15)-N(15)-Fe(1) | 155.62(14) |
| C(41)-N(21)-C(13) | 119.01(13) |
| C(41)-N(21)-Fe(1) | 121.45(10) |
| C(13)-N(21)-Fe(1) | 119.54(10) |
| C(22)-C(12)-C(62) | 120.60(13) |
| C(22)-C(12)-N(11) | 121.31(13) |

|                      |            |
|----------------------|------------|
| C(62)-C(12)-N(11)    | 117.92(12) |
| C(23)-C(13)-C(63)    | 121.21(17) |
| C(23)-C(13)-N(21)    | 118.76(15) |
| C(63)-C(13)-N(21)    | 119.99(17) |
| C(24)-C(14)-Fe(1)    | 121.49(11) |
| N(15)-C(15)-C(25)    | 178.2(2)   |
| N(11)-C(21)-C(31)    | 123.40(13) |
| N(11)-C(21)-C(11)    | 121.15(14) |
| C(31)-C(21)-C(11)    | 115.41(14) |
| C(32)-C(22)-C(12)    | 118.31(15) |
| C(32)-C(22)-C(72)    | 119.36(15) |
| C(12)-C(22)-C(72)    | 122.32(14) |
| C(33)-C(23)-C(13)    | 118.98(19) |
| C(33)-C(23)-C(73)    | 118.58(19) |
| C(13)-C(23)-C(73)    | 122.42(15) |
| C(34)-C(24)-C(44)    | 110.18(18) |
| C(34)-C(24)-C(54)    | 108.38(16) |
| C(44)-C(24)-C(54)    | 107.66(16) |
| C(34)-C(24)-C(14)    | 109.99(15) |
| C(44)-C(24)-C(14)    | 109.80(15) |
| C(54)-C(24)-C(14)    | 110.79(15) |
| C(15)-C(25)-C(55)    | 107.4(2)   |
| C(15)-C(25)-C(45)    | 108.19(19) |
| C(55)-C(25)-C(45)    | 111.9(3)   |
| C(15)-C(25)-C(35)    | 107.56(17) |
| C(55)-C(25)-C(35)    | 111.7(3)   |
| C(45)-C(25)-C(35)    | 109.8(2)   |
| C(41)-C(31)-C(21)    | 129.32(14) |
| C(42)-C(32)-C(22)    | 121.55(16) |
| C(43)-C(33)-C(23)    | 120.2(2)   |
| N(21)-C(41)-C(31)    | 123.36(14) |
| N(21)-C(41)-C(51)    | 119.81(14) |
| C(31)-C(41)-C(51)    | 116.82(14) |
| C(32)-C(42)-C(52)    | 120.06(16) |
| C(53)-C(43)-C(33)    | 120.50(19) |
| C(42)-C(52)-C(62)    | 121.23(16) |
| C(43)-C(53)-C(63)    | 122.0(2)   |
| C(52)-C(62)-C(12)    | 118.23(14) |
| C(52)-C(62)-C(102)   | 121.03(14) |
| C(12)-C(62)-C(102)   | 120.73(13) |
| C(13)-C(63)-C(53)    | 117.1(2)   |
| C(13)-C(63)-C(103)   | 122.09(17) |
| C(53)-C(63)-C(103)   | 120.81(18) |
| C(22)-C(72)-C(82)    | 111.15(15) |
| C(22)-C(72)-C(92)    | 111.46(16) |
| C(82)-C(72)-C(92)    | 109.96(16) |
| C(23)-C(73)-C(93)    | 111.64(17) |
| C(23)-C(73)-C(83)    | 112.09(17) |
| C(93)-C(73)-C(83)    | 110.1(2)   |
| C(62)-C(102)-C(112)  | 111.39(14) |
| C(62)-C(102)-C(122)  | 113.32(15) |
| C(112)-C(102)-C(122) | 111.04(18) |
| C(63)-C(103)-C(113)  | 110.9(2)   |
| C(63)-C(103)-C(123)  | 112.2(2)   |
| C(113)-C(103)-C(123) | 110.5(2)   |

---

Table S8. Anisotropic displacement parameters ( $\text{\AA}^2 \times 10^3$ ) for 2.  
The anisotropic displacement factor exponent takes the form:  
 $-2 \pi^2 [ h^2 a^{*2} U_{11} + \dots + 2 h k a^* b^* U_{12} ]$

|        | U11    | U22    | U33    | U23    | U13    | U12    |
|--------|--------|--------|--------|--------|--------|--------|
| Fe(1)  | 33(1)  | 25(1)  | 27(1)  | -1(1)  | 11(1)  | 4(1)   |
| N(11)  | 30(1)  | 27(1)  | 26(1)  | -1(1)  | 10(1)  | -1(1)  |
| N(15)  | 45(1)  | 39(1)  | 40(1)  | -6(1)  | 9(1)   | 2(1)   |
| N(21)  | 40(1)  | 28(1)  | 28(1)  | 4(1)   | 14(1)  | 5(1)   |
| C(11)  | 50(1)  | 39(1)  | 44(1)  | 0(1)   | 27(1)  | 6(1)   |
| C(12)  | 34(1)  | 29(1)  | 27(1)  | 0(1)   | 13(1)  | 1(1)   |
| C(13)  | 51(1)  | 32(1)  | 38(1)  | 10(1)  | 23(1)  | 13(1)  |
| C(14)  | 35(1)  | 34(1)  | 43(1)  | -6(1)  | 12(1)  | 3(1)   |
| C(15)  | 46(1)  | 39(1)  | 38(1)  | -8(1)  | 6(1)   | 0(1)   |
| C(21)  | 29(1)  | 29(1)  | 32(1)  | -4(1)  | 12(1)  | -2(1)  |
| C(22)  | 36(1)  | 34(1)  | 38(1)  | 2(1)   | 15(1)  | 0(1)   |
| C(23)  | 48(1)  | 34(1)  | 57(1)  | 14(1)  | 28(1)  | 8(1)   |
| C(24)  | 37(1)  | 32(1)  | 40(1)  | -8(1)  | 5(1)   | 6(1)   |
| C(25)  | 44(1)  | 52(1)  | 61(1)  | -2(1)  | -5(1)  | 2(1)   |
| C(31)  | 33(1)  | 29(1)  | 35(1)  | 0(1)   | 11(1)  | 9(1)   |
| C(32)  | 49(1)  | 37(1)  | 50(1)  | 9(1)   | 23(1)  | -5(1)  |
| C(33)  | 59(1)  | 55(1)  | 74(1)  | 26(1)  | 40(1)  | 10(1)  |
| C(34)  | 70(1)  | 41(1)  | 67(1)  | 4(1)   | 24(1)  | 5(1)   |
| C(35)  | 50(1)  | 112(2) | 95(2)  | 29(2)  | 21(1)  | 22(2)  |
| C(41)  | 36(1)  | 29(1)  | 29(1)  | 2(1)   | 8(1)   | 5(1)   |
| C(42)  | 57(1)  | 44(1)  | 40(1)  | 15(1)  | 17(1)  | 1(1)   |
| C(43)  | 77(2)  | 72(2)  | 79(2)  | 34(1)  | 56(1)  | 24(1)  |
| C(44)  | 68(1)  | 48(1)  | 57(1)  | -20(1) | -11(1) | 13(1)  |
| C(45)  | 64(2)  | 107(2) | 77(2)  | 31(2)  | 7(1)   | 24(2)  |
| C(51)  | 56(1)  | 37(1)  | 46(1)  | 12(1)  | 21(1)  | 15(1)  |
| C(52)  | 47(1)  | 44(1)  | 30(1)  | 5(1)   | 7(1)   | 1(1)   |
| C(53)  | 95(2)  | 77(2)  | 45(1)  | 23(1)  | 45(1)  | 34(1)  |
| C(54)  | 47(1)  | 47(1)  | 68(1)  | -8(1)  | 8(1)   | 18(1)  |
| C(55)  | 81(2)  | 100(3) | 201(5) | -72(3) | -56(3) | 5(2)   |
| C(62)  | 37(1)  | 33(1)  | 26(1)  | -1(1)  | 11(1)  | -1(1)  |
| C(63)  | 70(1)  | 49(1)  | 35(1)  | 11(1)  | 26(1)  | 20(1)  |
| C(72)  | 34(1)  | 39(1)  | 52(1)  | 3(1)   | 16(1)  | -6(1)  |
| C(73)  | 41(1)  | 44(1)  | 55(1)  | 6(1)   | 19(1)  | -6(1)  |
| C(82)  | 46(1)  | 44(1)  | 68(1)  | -6(1)  | 8(1)   | -10(1) |
| C(83)  | 60(1)  | 77(2)  | 72(2)  | 14(1)  | 15(1)  | 10(1)  |
| C(92)  | 41(1)  | 69(1)  | 79(2)  | 2(1)   | 28(1)  | -6(1)  |
| C(93)  | 84(2)  | 57(1)  | 74(2)  | -6(1)  | 16(1)  | 6(1)   |
| C(102) | 37(1)  | 43(1)  | 30(1)  | -1(1)  | 8(1)   | -7(1)  |
| C(103) | 84(2)  | 64(1)  | 32(1)  | 3(1)   | 21(1)  | 16(1)  |
| C(112) | 73(1)  | 51(1)  | 66(1)  | -26(1) | 31(1)  | -26(1) |
| C(113) | 137(2) | 76(2)  | 72(2)  | -24(2) | 34(2)  | 10(2)  |
| C(122) | 39(1)  | 88(2)  | 66(1)  | 27(1)  | 1(1)   | -14(1) |
| C(123) | 109(2) | 124(3) | 47(1)  | 25(2)  | 8(1)   | 14(2)  |

Table S9. Crystal data and structure refinement for 3.

|                                   |                                                                                                                                      |
|-----------------------------------|--------------------------------------------------------------------------------------------------------------------------------------|
| Identification code               | holjs104                                                                                                                             |
| Empirical formula                 | C79 H108 Cl2 Fe2 N6                                                                                                                  |
| Formula weight                    | 1324.31                                                                                                                              |
| Temperature                       | 193(2) K                                                                                                                             |
| Wavelength                        | 0.71073 Å                                                                                                                            |
| Crystal system, space group       | Triclinic, P-1                                                                                                                       |
| Unit cell dimensions              | a = 12.7967(17) Å    alpha = 88.453(2) deg.<br>b = 17.485(2) Å    beta = 76.926(2) deg.<br>c = 17.643(2) Å    gamma = 89.798(2) deg. |
| Volume                            | 3843.9(9) Å <sup>3</sup>                                                                                                             |
| Z, Calculated density             | 2, 1.144 Mg/m <sup>3</sup>                                                                                                           |
| Absorption coefficient            | 0.491 mm <sup>-1</sup>                                                                                                               |
| F(000)                            | 1420                                                                                                                                 |
| Crystal size                      | 0.40 x 0.10 x 0.10 mm                                                                                                                |
| Theta range for data collection   | 1.63 to 28.37 deg.                                                                                                                   |
| Limiting indices                  | -17<=h<=17, -23<=k<=23, -23<=l<=23                                                                                                   |
| Reflections collected / unique    | 34674 / 17992 [R(int) = 0.0458]                                                                                                      |
| Completeness to theta = 28.37     | 93.5 %                                                                                                                               |
| Absorption correction             | None                                                                                                                                 |
| Refinement method                 | Full-matrix least-squares on F <sup>2</sup>                                                                                          |
| Data / restraints / parameters    | 17992 / 0 / 813                                                                                                                      |
| Goodness-of-fit on F <sup>2</sup> | 0.964                                                                                                                                |
| Final R indices [I>2sigma(I)]     | R1 = 0.0579, wR2 = 0.1254                                                                                                            |
| R indices (all data)              | R1 = 0.1427, wR2 = 0.1523                                                                                                            |
| Largest diff. peak and hole       | 0.580 and -0.345 e.Å <sup>-3</sup>                                                                                                   |



Table S10. Atomic coordinates ( $\times 10^4$ ) and equivalent isotropic displacement parameters ( $\text{Å}^2 \times 10^3$ ) for 3. U(eq) is defined as one third of the trace of the orthogonalized  $U_{ij}$  tensor.

|        | x        | y        | z        | U(eq)  |
|--------|----------|----------|----------|--------|
| Fe(2)  | 7218(1)  | 4422(1)  | 7571(1)  | 34(1)  |
| Fe(1)  | 9275(1)  | 9530(1)  | 7905(1)  | 41(1)  |
| Cl(2)  | 6780(1)  | 3271(1)  | 8137(1)  | 55(1)  |
| Cl(1)  | 9221(1)  | 8473(1)  | 8657(1)  | 70(1)  |
| N(22)  | 8751(2)  | 4657(1)  | 7055(1)  | 31(1)  |
| N(21)  | 10461(2) | 9863(1)  | 7012(1)  | 34(1)  |
| N(18)  | 6862(2)  | 5161(1)  | 8518(1)  | 37(1)  |
| N(14)  | 9081(2)  | 10426(2) | 8702(1)  | 41(1)  |
| N(11)  | 8129(2)  | 9718(2)  | 7309(1)  | 43(1)  |
| N(12)  | 6624(2)  | 4915(1)  | 6720(1)  | 35(1)  |
| C(35)  | 8306(3)  | 5500(2)  | 6082(2)  | 40(1)  |
| C(67)  | 9792(2)  | 3488(2)  | 7055(2)  | 39(1)  |
| C(17)  | 9551(2)  | 4223(2)  | 7335(2)  | 33(1)  |
| C(45)  | 9036(2)  | 5149(2)  | 6456(2)  | 35(1)  |
| C(31)  | 9278(2)  | 10409(2) | 6256(2)  | 36(1)  |
| C(25)  | 7202(3)  | 5363(2)  | 6162(2)  | 42(1)  |
| C(13)  | 11543(3) | 9629(2)  | 7036(2)  | 40(1)  |
| C(14)  | 8964(2)  | 11141(2) | 8437(2)  | 39(1)  |
| C(27)  | 10022(2) | 4510(2)  | 7914(2)  | 40(1)  |
| C(58)  | 6485(2)  | 4952(2)  | 9261(2)  | 42(1)  |
| C(28)  | 7009(2)  | 6435(2)  | 8946(2)  | 41(1)  |
| C(18)  | 7105(2)  | 5902(2)  | 8377(2)  | 39(1)  |
| C(55)  | 10213(2) | 5332(2)  | 6128(2)  | 47(1)  |
| C(51)  | 11237(3) | 10564(2) | 5778(2)  | 50(1)  |
| C(34)  | 8568(2)  | 11664(2) | 9714(2)  | 40(1)  |
| C(107) | 9330(3)  | 3178(2)  | 6400(2)  | 50(1)  |
| C(16)  | 5528(3)  | 4721(2)  | 6695(2)  | 41(1)  |
| C(26)  | 4685(3)  | 5210(2)  | 7006(2)  | 46(1)  |
| C(44)  | 8727(3)  | 10935(2) | 9983(2)  | 50(1)  |
| C(24)  | 8713(2)  | 11758(2) | 8907(2)  | 41(1)  |
| C(21)  | 8279(2)  | 10128(2) | 6650(2)  | 38(1)  |
| C(63)  | 11865(3) | 8883(2)  | 6813(2)  | 48(1)  |
| C(41)  | 10292(2) | 10255(2) | 6389(2)  | 36(1)  |
| C(37)  | 10740(3) | 4043(2)  | 8193(2)  | 54(1)  |
| C(68)  | 6576(3)  | 6792(2)  | 10371(2) | 49(1)  |
| C(72)  | 6358(3)  | 10476(4) | 8400(3)  | 110(2) |
| C(57)  | 10512(3) | 3047(2)  | 7355(2)  | 50(1)  |
| C(33)  | 13256(3) | 9854(2)  | 7329(2)  | 66(1)  |
| C(76)  | 4839(3)  | 5964(2)  | 7367(2)  | 49(1)  |
| C(64)  | 8242(3)  | 12347(2) | 10243(2) | 51(1)  |
| C(48)  | 6367(2)  | 5450(2)  | 9868(2)  | 44(1)  |
| C(23)  | 12234(3) | 10117(2) | 7310(2)  | 49(1)  |
| C(54)  | 8965(3)  | 10340(2) | 9477(2)  | 51(1)  |
| C(62)  | 7065(3)  | 8563(2)  | 7360(3)  | 69(1)  |
| C(103) | 11119(3) | 8343(2)  | 6533(2)  | 55(1)  |
| C(11)  | 7338(3)  | 10311(2) | 6286(2)  | 56(1)  |
| C(73)  | 11913(3) | 10918(2) | 7586(2)  | 56(1)  |
| C(38)  | 6637(2)  | 6217(2)  | 9730(2)  | 40(1)  |
| C(47)  | 10984(3) | 3314(2)  | 7923(2)  | 59(1)  |
| C(77)  | 9794(3)  | 5296(2)  | 8239(2)  | 48(1)  |
| C(53)  | 12899(3) | 8661(2)  | 6840(2)  | 65(1)  |
| C(15)  | 6688(3)  | 5747(2)  | 5556(2)  | 65(1)  |
| C(98)  | 6222(3)  | 6421(2)  | 11188(2) | 71(1)  |
| C(12)  | 7145(3)  | 9311(2)  | 7601(2)  | 57(1)  |

|        |          |          |          |        |
|--------|----------|----------|----------|--------|
| C(86)  | 4311(3)  | 6629(2)  | 7004(3)  | 79(1)  |
| C(056) | 5339(3)  | 4015(2)  | 6387(2)  | 56(1)  |
| C(117) | 10169(4) | 3187(3)  | 5645(2)  | 108(2) |
| C(94)  | 7212(4)  | 12686(3) | 10089(2) | 101(2) |
| C(127) | 8881(3)  | 2379(2)  | 6565(2)  | 66(1)  |
| C(43)  | 13584(3) | 9137(3)  | 7093(2)  | 74(1)  |
| C(36)  | 3652(3)  | 4973(2)  | 6991(2)  | 62(1)  |
| C(22)  | 6322(3)  | 9646(3)  | 8163(2)  | 76(1)  |
| C(87)  | 10800(3) | 5809(2)  | 8076(2)  | 71(1)  |
| C(42)  | 5376(4)  | 8446(4)  | 8271(3)  | 105(2) |
| C(46)  | 3458(3)  | 4291(3)  | 6684(2)  | 71(1)  |
| C(116) | 6010(5)  | 2646(3)  | 6277(4)  | 124(2) |
| C(74)  | 8025(3)  | 12112(2) | 11104(2) | 73(1)  |
| C(78)  | 5779(4)  | 7412(3)  | 10268(2) | 94(2)  |
| C(102) | 7912(4)  | 8216(2)  | 6715(3)  | 88(2)  |
| C(84)  | 9147(4)  | 12923(3) | 10083(3) | 108(2) |
| C(97)  | 9316(3)  | 5256(2)  | 9110(2)  | 70(1)  |
| C(106) | 6251(4)  | 3479(2)  | 6038(3)  | 79(1)  |
| C(32)  | 5428(4)  | 9198(4)  | 8490(3)  | 104(2) |
| C(93)  | 12729(3) | 11524(2) | 7169(3)  | 84(1)  |
| C(88)  | 7690(3)  | 7141(2)  | 10301(2) | 67(1)  |
| C(96)  | 4415(3)  | 5929(2)  | 8244(2)  | 67(1)  |
| C(82)  | 5500(4)  | 10975(3) | 8132(4)  | 138(3) |
| C(83)  | 11762(3) | 10952(2) | 8468(2)  | 75(1)  |
| C(123) | 11207(4) | 8435(2)  | 5660(2)  | 80(1)  |
| C(112) | 7485(6)  | 8144(3)  | 5963(3)  | 147(3) |
| C(56)  | 4296(4)  | 3821(2)  | 6387(2)  | 72(1)  |
| C(122) | 8312(5)  | 7442(2)  | 6943(3)  | 118(2) |
| C(113) | 11284(4) | 7499(2)  | 6748(3)  | 97(2)  |
| C(52)  | 6155(4)  | 8136(3)  | 7710(3)  | 95(2)  |
| C(92)  | 6264(4)  | 10544(5) | 9270(3)  | 205(4) |
| C(126) | 6561(5)  | 3585(4)  | 5165(3)  | 148(3) |
| C(1S)  | 5311(4)  | 9690(3)  | 5085(3)  | 81(1)  |
| C(2S)  | 4838(5)  | 9063(4)  | 4820(4)  | 143(2) |
| C(3S)  | 5383(10) | 8433(8)  | 5113(7)  | 303(6) |

---

Table S11. Bond lengths [Å] and angles [deg] for 3.

---

|               |            |
|---------------|------------|
| Fe(2)-N(12)   | 2.004(2)   |
| Fe(2)-N(22)   | 2.007(2)   |
| Fe(2)-N(18)   | 2.106(2)   |
| Fe(2)-Cl(2)   | 2.2372(9)  |
| Fe(1)-N(21)   | 1.999(2)   |
| Fe(1)-N(11)   | 2.010(3)   |
| Fe(1)-N(14)   | 2.110(3)   |
| Fe(1)-Cl(1)   | 2.2376(10) |
| N(22)-C(45)   | 1.331(4)   |
| N(22)-C(17)   | 1.438(4)   |
| N(21)-C(41)   | 1.338(3)   |
| N(21)-C(13)   | 1.452(4)   |
| N(18)-C(58)   | 1.332(4)   |
| N(18)-C(18)   | 1.338(4)   |
| N(14)-C(14)   | 1.344(4)   |
| N(14)-C(54)   | 1.346(4)   |
| N(11)-C(21)   | 1.325(4)   |
| N(11)-C(12)   | 1.433(4)   |
| N(12)-C(25)   | 1.328(4)   |
| N(12)-C(16)   | 1.454(4)   |
| C(35)-C(45)   | 1.393(4)   |
| C(35)-C(25)   | 1.408(4)   |
| C(67)-C(57)   | 1.384(4)   |
| C(67)-C(17)   | 1.398(4)   |
| C(67)-C(107)  | 1.524(4)   |
| C(17)-C(27)   | 1.403(4)   |
| C(45)-C(55)   | 1.518(4)   |
| C(31)-C(21)   | 1.393(4)   |
| C(31)-C(41)   | 1.394(4)   |
| C(25)-C(15)   | 1.518(4)   |
| C(13)-C(23)   | 1.401(4)   |
| C(13)-C(63)   | 1.407(4)   |
| C(14)-C(24)   | 1.372(4)   |
| C(27)-C(37)   | 1.389(4)   |
| C(27)-C(77)   | 1.506(4)   |
| C(58)-C(48)   | 1.380(4)   |
| C(28)-C(18)   | 1.374(4)   |
| C(28)-C(38)   | 1.399(4)   |
| C(51)-C(41)   | 1.517(4)   |
| C(34)-C(44)   | 1.379(4)   |
| C(34)-C(24)   | 1.398(4)   |
| C(34)-C(64)   | 1.534(4)   |
| C(107)-C(127) | 1.508(4)   |
| C(107)-C(117) | 1.510(5)   |
| C(16)-C(26)   | 1.395(4)   |
| C(16)-C(056)  | 1.405(4)   |
| C(26)-C(36)   | 1.392(5)   |
| C(26)-C(76)   | 1.513(5)   |
| C(44)-C(54)   | 1.377(4)   |
| C(21)-C(11)   | 1.518(4)   |
| C(63)-C(53)   | 1.388(5)   |
| C(63)-C(103)  | 1.514(5)   |
| C(37)-C(47)   | 1.383(5)   |
| C(68)-C(78)   | 1.521(5)   |
| C(68)-C(38)   | 1.523(4)   |
| C(68)-C(88)   | 1.529(5)   |
| C(68)-C(98)   | 1.535(5)   |
| C(72)-C(92)   | 1.520(6)   |
| C(72)-C(22)   | 1.525(7)   |
| C(72)-C(82)   | 1.549(8)   |
| C(57)-C(47)   | 1.374(5)   |

|               |           |
|---------------|-----------|
| C(33)-C(43)   | 1.365(5)  |
| C(33)-C(23)   | 1.393(5)  |
| C(76)-C(96)   | 1.519(5)  |
| C(76)-C(86)   | 1.539(5)  |
| C(64)-C(84)   | 1.510(5)  |
| C(64)-C(94)   | 1.520(5)  |
| C(64)-C(74)   | 1.527(5)  |
| C(48)-C(38)   | 1.387(4)  |
| C(23)-C(73)   | 1.519(4)  |
| C(62)-C(52)   | 1.396(6)  |
| C(62)-C(12)   | 1.398(5)  |
| C(62)-C(102)  | 1.520(6)  |
| C(103)-C(123) | 1.523(5)  |
| C(103)-C(113) | 1.538(5)  |
| C(73)-C(83)   | 1.527(5)  |
| C(73)-C(93)   | 1.541(5)  |
| C(77)-C(97)   | 1.521(5)  |
| C(77)-C(87)   | 1.540(5)  |
| C(53)-C(43)   | 1.365(5)  |
| C(12)-C(22)   | 1.410(5)  |
| C(056)-C(56)  | 1.379(5)  |
| C(056)-C(106) | 1.522(5)  |
| C(36)-C(46)   | 1.370(5)  |
| C(22)-C(32)   | 1.393(6)  |
| C(42)-C(52)   | 1.359(7)  |
| C(42)-C(32)   | 1.386(7)  |
| C(46)-C(56)   | 1.364(5)  |
| C(116)-C(106) | 1.518(6)  |
| C(102)-C(122) | 1.522(6)  |
| C(102)-C(112) | 1.553(7)  |
| C(106)-C(126) | 1.508(7)  |
| C(1S)-C(2S)   | 1.397(7)  |
| C(1S)-C(1S)#1 | 1.407(8)  |
| C(2S)-C(3S)   | 1.448(13) |

|                   |            |
|-------------------|------------|
| N(12)-Fe(2)-N(22) | 94.47(10)  |
| N(12)-Fe(2)-N(18) | 106.53(10) |
| N(22)-Fe(2)-N(18) | 104.41(9)  |
| N(12)-Fe(2)-Cl(2) | 126.73(8)  |
| N(22)-Fe(2)-Cl(2) | 119.77(7)  |
| N(18)-Fe(2)-Cl(2) | 102.83(7)  |
| N(21)-Fe(1)-N(11) | 93.51(10)  |
| N(21)-Fe(1)-N(14) | 105.75(10) |
| N(11)-Fe(1)-N(14) | 104.32(10) |
| N(21)-Fe(1)-Cl(1) | 127.15(7)  |
| N(11)-Fe(1)-Cl(1) | 120.06(8)  |
| N(14)-Fe(1)-Cl(1) | 103.71(7)  |
| C(45)-N(22)-C(17) | 120.5(2)   |
| C(45)-N(22)-Fe(2) | 123.1(2)   |
| C(17)-N(22)-Fe(2) | 116.25(17) |
| C(41)-N(21)-C(13) | 119.5(2)   |
| C(41)-N(21)-Fe(1) | 123.1(2)   |
| C(13)-N(21)-Fe(1) | 117.41(18) |
| C(58)-N(18)-C(18) | 116.1(3)   |
| C(58)-N(18)-Fe(2) | 126.0(2)   |
| C(18)-N(18)-Fe(2) | 117.7(2)   |
| C(14)-N(14)-C(54) | 115.9(3)   |
| C(14)-N(14)-Fe(1) | 118.3(2)   |
| C(54)-N(14)-Fe(1) | 125.6(2)   |
| C(21)-N(11)-C(12) | 120.7(3)   |
| C(21)-N(11)-Fe(1) | 123.8(2)   |
| C(12)-N(11)-Fe(1) | 115.2(2)   |
| C(25)-N(12)-C(16) | 119.5(2)   |
| C(25)-N(12)-Fe(2) | 123.2(2)   |
| C(16)-N(12)-Fe(2) | 117.18(18) |

|                      |          |
|----------------------|----------|
| C(45)-C(35)-C(25)    | 130.1(3) |
| C(57)-C(67)-C(17)    | 118.9(3) |
| C(57)-C(67)-C(107)   | 119.4(3) |
| C(17)-C(67)-C(107)   | 121.7(3) |
| C(67)-C(17)-C(27)    | 120.8(3) |
| C(67)-C(17)-N(22)    | 118.4(3) |
| C(27)-C(17)-N(22)    | 120.7(3) |
| N(22)-C(45)-C(35)    | 123.4(3) |
| N(22)-C(45)-C(55)    | 120.0(3) |
| C(35)-C(45)-C(55)    | 116.5(3) |
| C(21)-C(31)-C(41)    | 129.5(3) |
| N(12)-C(25)-C(35)    | 123.4(3) |
| N(12)-C(25)-C(15)    | 120.4(3) |
| C(35)-C(25)-C(15)    | 116.2(3) |
| C(23)-C(13)-C(63)    | 120.6(3) |
| C(23)-C(13)-N(21)    | 121.3(3) |
| C(63)-C(13)-N(21)    | 118.1(3) |
| N(14)-C(14)-C(24)    | 123.9(3) |
| C(37)-C(27)-C(17)    | 117.9(3) |
| C(37)-C(27)-C(77)    | 118.9(3) |
| C(17)-C(27)-C(77)    | 123.2(3) |
| N(18)-C(58)-C(48)    | 123.5(3) |
| C(18)-C(28)-C(38)    | 120.2(3) |
| N(18)-C(18)-C(28)    | 124.0(3) |
| C(44)-C(34)-C(24)    | 116.0(3) |
| C(44)-C(34)-C(64)    | 123.9(3) |
| C(24)-C(34)-C(64)    | 120.1(3) |
| C(127)-C(107)-C(117) | 108.9(3) |
| C(127)-C(107)-C(67)  | 113.5(3) |
| C(117)-C(107)-C(67)  | 110.6(3) |
| C(26)-C(16)-C(056)   | 121.2(3) |
| C(26)-C(16)-N(12)    | 120.4(3) |
| C(056)-C(16)-N(12)   | 118.3(3) |
| C(36)-C(26)-C(16)    | 117.3(3) |
| C(36)-C(26)-C(76)    | 119.2(3) |
| C(16)-C(26)-C(76)    | 123.4(3) |
| C(54)-C(44)-C(34)    | 120.7(3) |
| C(14)-C(24)-C(34)    | 120.1(3) |
| N(11)-C(21)-C(31)    | 123.3(3) |
| N(11)-C(21)-C(11)    | 120.1(3) |
| C(31)-C(21)-C(11)    | 116.6(3) |
| C(53)-C(63)-C(13)    | 117.9(3) |
| C(53)-C(63)-C(103)   | 120.9(3) |
| C(13)-C(63)-C(103)   | 121.2(3) |
| N(21)-C(41)-C(31)    | 123.9(3) |
| N(21)-C(41)-C(51)    | 120.0(3) |
| C(31)-C(41)-C(51)    | 116.1(3) |
| C(47)-C(37)-C(27)    | 122.0(3) |
| C(78)-C(68)-C(38)    | 108.4(3) |
| C(78)-C(68)-C(88)    | 110.3(3) |
| C(38)-C(68)-C(88)    | 108.7(3) |
| C(78)-C(68)-C(98)    | 109.2(3) |
| C(38)-C(68)-C(98)    | 112.3(3) |
| C(88)-C(68)-C(98)    | 107.9(3) |
| C(92)-C(72)-C(22)    | 112.1(6) |
| C(92)-C(72)-C(82)    | 110.6(5) |
| C(22)-C(72)-C(82)    | 112.3(3) |
| C(47)-C(57)-C(67)    | 121.5(3) |
| C(43)-C(33)-C(23)    | 121.4(4) |
| C(26)-C(76)-C(96)    | 111.5(3) |
| C(26)-C(76)-C(86)    | 111.7(3) |
| C(96)-C(76)-C(86)    | 110.1(3) |
| C(84)-C(64)-C(94)    | 111.8(4) |
| C(84)-C(64)-C(74)    | 107.8(3) |
| C(94)-C(64)-C(74)    | 107.5(3) |

|                      |          |
|----------------------|----------|
| C(84)-C(64)-C(34)    | 108.8(3) |
| C(94)-C(64)-C(34)    | 108.8(3) |
| C(74)-C(64)-C(34)    | 112.1(3) |
| C(58)-C(48)-C(38)    | 120.8(3) |
| C(33)-C(23)-C(13)    | 118.3(3) |
| C(33)-C(23)-C(73)    | 118.9(3) |
| C(13)-C(23)-C(73)    | 122.8(3) |
| N(14)-C(54)-C(44)    | 123.4(3) |
| C(52)-C(62)-C(12)    | 118.2(5) |
| C(52)-C(62)-C(102)   | 119.6(5) |
| C(12)-C(62)-C(102)   | 122.2(3) |
| C(63)-C(103)-C(123)  | 111.8(3) |
| C(63)-C(103)-C(113)  | 113.1(3) |
| C(123)-C(103)-C(113) | 109.9(3) |
| C(23)-C(73)-C(83)    | 110.6(3) |
| C(23)-C(73)-C(93)    | 111.8(3) |
| C(83)-C(73)-C(93)    | 110.9(3) |
| C(48)-C(38)-C(28)    | 115.3(3) |
| C(48)-C(38)-C(68)    | 123.8(3) |
| C(28)-C(38)-C(68)    | 120.9(3) |
| C(57)-C(47)-C(37)    | 119.0(3) |
| C(27)-C(77)-C(97)    | 111.4(3) |
| C(27)-C(77)-C(87)    | 112.5(3) |
| C(97)-C(77)-C(87)    | 109.2(3) |
| C(43)-C(53)-C(63)    | 121.9(3) |
| C(62)-C(12)-C(22)    | 121.8(4) |
| C(62)-C(12)-N(11)    | 118.1(4) |
| C(22)-C(12)-N(11)    | 119.9(4) |
| C(56)-C(056)-C(16)   | 118.2(3) |
| C(56)-C(056)-C(106)  | 119.9(4) |
| C(16)-C(056)-C(106)  | 121.9(3) |
| C(53)-C(43)-C(33)    | 119.9(4) |
| C(46)-C(36)-C(26)    | 122.0(4) |
| C(32)-C(22)-C(12)    | 117.7(5) |
| C(32)-C(22)-C(72)    | 119.4(5) |
| C(12)-C(22)-C(72)    | 122.9(4) |
| C(52)-C(42)-C(32)    | 121.8(5) |
| C(56)-C(46)-C(36)    | 119.6(4) |
| C(122)-C(102)-C(62)  | 113.3(4) |
| C(122)-C(102)-C(112) | 109.7(4) |
| C(62)-C(102)-C(112)  | 110.8(5) |
| C(126)-C(106)-C(116) | 111.5(4) |
| C(126)-C(106)-C(056) | 110.7(4) |
| C(116)-C(106)-C(056) | 113.2(4) |
| C(42)-C(32)-C(22)    | 120.0(5) |
| C(46)-C(56)-C(056)   | 121.7(4) |
| C(42)-C(52)-C(62)    | 120.4(5) |
| C(2S)-C(1S)-C(1S)#1  | 103.1(6) |
| C(1S)-C(2S)-C(3S)    | 101.3(7) |

---

Symmetry transformations used to generate equivalent atoms:  
#1 -x+1,-y+2,-z+1

Table S12. Anisotropic displacement parameters ( $\text{\AA}^2 \times 10^3$ ) for 3.  
The anisotropic displacement factor exponent takes the form:  
 $-2 \pi^2 [ h^2 a^{*2} U_{11} + \dots + 2 h k a^* b^* U_{12} ]$

|        | U11   | U22    | U33    | U23    | U13    | U12    |
|--------|-------|--------|--------|--------|--------|--------|
| Fe(2)  | 40(1) | 33(1)  | 28(1)  | 3(1)   | -7(1)  | 0(1)   |
| Fe(1)  | 52(1) | 38(1)  | 31(1)  | 4(1)   | -9(1)  | -2(1)  |
| Cl(2)  | 65(1) | 41(1)  | 53(1)  | 11(1)  | -5(1)  | -7(1)  |
| Cl(1)  | 92(1) | 54(1)  | 60(1)  | 22(1)  | -13(1) | 2(1)   |
| N(22)  | 39(1) | 28(1)  | 27(1)  | -1(1)  | -7(1)  | 1(1)   |
| N(21)  | 43(2) | 26(1)  | 33(1)  | -2(1)  | -7(1)  | 5(1)   |
| N(18)  | 38(2) | 42(2)  | 31(1)  | 1(1)   | -6(1)  | -4(1)  |
| N(14)  | 47(2) | 47(2)  | 29(1)  | 2(1)   | -12(1) | -2(1)  |
| N(11)  | 44(2) | 52(2)  | 32(2)  | -1(1)  | -7(1)  | -10(1) |
| N(12)  | 43(2) | 35(1)  | 28(1)  | -1(1)  | -7(1)  | 6(1)   |
| C(35)  | 54(2) | 28(2)  | 34(2)  | 9(1)   | -4(2)  | 3(2)   |
| C(67)  | 46(2) | 32(2)  | 35(2)  | 5(1)   | -2(2)  | 1(2)   |
| C(17)  | 34(2) | 31(2)  | 32(2)  | 3(1)   | -3(1)  | 1(1)   |
| C(45)  | 44(2) | 29(2)  | 30(2)  | -2(1)  | -4(1)  | 2(1)   |
| C(31)  | 46(2) | 27(2)  | 33(2)  | 3(1)   | -7(2)  | 5(1)   |
| C(25)  | 54(2) | 43(2)  | 29(2)  | 0(2)   | -10(2) | 12(2)  |
| C(13)  | 47(2) | 35(2)  | 37(2)  | 1(1)   | -9(2)  | 10(2)  |
| C(14)  | 39(2) | 51(2)  | 28(2)  | 3(2)   | -7(1)  | -1(2)  |
| C(27)  | 36(2) | 43(2)  | 39(2)  | -2(2)  | -7(2)  | 2(2)   |
| C(58)  | 44(2) | 46(2)  | 32(2)  | 4(2)   | -2(2)  | -9(2)  |
| C(28)  | 40(2) | 42(2)  | 41(2)  | -3(2)  | -8(2)  | 2(2)   |
| C(18)  | 46(2) | 43(2)  | 28(2)  | 0(2)   | -7(1)  | 3(2)   |
| C(55)  | 48(2) | 47(2)  | 42(2)  | 6(2)   | 0(2)   | -3(2)  |
| C(51)  | 50(2) | 51(2)  | 45(2)  | 9(2)   | -2(2)  | 1(2)   |
| C(34)  | 33(2) | 53(2)  | 38(2)  | -6(2)  | -14(2) | 1(2)   |
| C(107) | 77(3) | 31(2)  | 46(2)  | -4(2)  | -20(2) | 11(2)  |
| C(16)  | 48(2) | 45(2)  | 35(2)  | 2(2)   | -17(2) | 2(2)   |
| C(26)  | 42(2) | 54(2)  | 42(2)  | 4(2)   | -12(2) | 3(2)   |
| C(44)  | 64(2) | 57(2)  | 32(2)  | -1(2)  | -18(2) | 6(2)   |
| C(24)  | 44(2) | 41(2)  | 35(2)  | 1(2)   | -5(2)  | 2(2)   |
| C(21)  | 43(2) | 38(2)  | 36(2)  | -8(2)  | -14(2) | 4(2)   |
| C(63)  | 63(2) | 43(2)  | 39(2)  | -3(2)  | -13(2) | 19(2)  |
| C(41)  | 48(2) | 27(2)  | 30(2)  | -2(1)  | -6(1)  | 4(1)   |
| C(37)  | 52(2) | 62(3)  | 53(2)  | -2(2)  | -24(2) | 6(2)   |
| C(68)  | 48(2) | 59(2)  | 41(2)  | -16(2) | -9(2)  | 11(2)  |
| C(72)  | 44(3) | 194(6) | 87(4)  | -82(4) | 6(2)   | -34(3) |
| C(57)  | 55(2) | 37(2)  | 56(2)  | 1(2)   | -11(2) | 10(2)  |
| C(33)  | 54(2) | 72(3)  | 79(3)  | -19(2) | -28(2) | 18(2)  |
| C(76)  | 43(2) | 53(2)  | 52(2)  | -4(2)  | -12(2) | 15(2)  |
| C(64)  | 57(2) | 59(2)  | 38(2)  | -13(2) | -12(2) | 11(2)  |
| C(48)  | 40(2) | 62(2)  | 28(2)  | 0(2)   | -1(1)  | -7(2)  |
| C(23)  | 44(2) | 49(2)  | 54(2)  | -10(2) | -11(2) | 13(2)  |
| C(54)  | 71(3) | 50(2)  | 36(2)  | 1(2)   | -22(2) | 4(2)   |
| C(62)  | 71(3) | 68(3)  | 73(3)  | 32(2)  | -32(2) | -32(2) |
| C(103) | 87(3) | 33(2)  | 48(2)  | -6(2)  | -18(2) | 15(2)  |
| C(11)  | 55(2) | 68(3)  | 50(2)  | -4(2)  | -22(2) | 2(2)   |
| C(73)  | 43(2) | 49(2)  | 80(3)  | -19(2) | -20(2) | 5(2)   |
| C(38)  | 26(2) | 55(2)  | 38(2)  | -7(2)  | -4(1)  | 3(2)   |
| C(47)  | 57(2) | 54(2)  | 69(3)  | 8(2)   | -23(2) | 13(2)  |
| C(77)  | 46(2) | 58(2)  | 46(2)  | -15(2) | -20(2) | 10(2)  |
| C(53)  | 88(3) | 51(2)  | 61(3)  | -10(2) | -24(2) | 33(2)  |
| C(15)  | 67(3) | 82(3)  | 44(2)  | 22(2)  | -9(2)  | 17(2)  |
| C(98)  | 73(3) | 96(3)  | 42(2)  | -23(2) | -4(2)  | 0(2)   |
| C(12)  | 53(2) | 83(3)  | 38(2)  | 8(2)   | -18(2) | -27(2) |
| C(86)  | 80(3) | 65(3)  | 101(3) | 0(2)   | -42(3) | 25(2)  |

|        |        |         |        |         |        |         |
|--------|--------|---------|--------|---------|--------|---------|
| C(056) | 62(3)  | 57(2)   | 54(2)  | -14(2)  | -24(2) | 3(2)    |
| C(117) | 174(5) | 96(4)   | 42(3)  | -7(2)   | 1(3)   | -59(4)  |
| C(94)  | 111(4) | 140(5)  | 59(3)  | -37(3)  | -30(3) | 82(3)   |
| C(127) | 89(3)  | 47(2)   | 61(2)  | -11(2)  | -16(2) | -8(2)   |
| C(43)  | 68(3)  | 83(3)   | 77(3)  | -13(2)  | -30(2) | 40(3)   |
| C(36)  | 47(2)  | 77(3)   | 62(3)  | -4(2)   | -9(2)  | 5(2)    |
| C(22)  | 43(2)  | 140(4)  | 46(2)  | -8(3)   | -10(2) | -33(3)  |
| C(87)  | 74(3)  | 59(3)   | 83(3)  | -24(2)  | -25(2) | -2(2)   |
| C(42)  | 57(3)  | 159(6)  | 104(4) | 77(4)   | -36(3) | -51(4)  |
| C(46)  | 53(3)  | 87(3)   | 77(3)  | 1(3)    | -25(2) | -12(2)  |
| C(116) | 150(5) | 64(3)   | 184(6) | -40(4)  | -90(5) | 26(3)   |
| C(74)  | 89(3)  | 94(3)   | 41(2)  | -22(2)  | -22(2) | 23(3)   |
| C(78)  | 113(4) | 102(4)  | 74(3)  | -37(3)  | -31(3) | 59(3)   |
| C(102) | 122(4) | 37(2)   | 98(4)  | 3(2)    | -10(3) | -29(2)  |
| C(84)  | 139(5) | 85(4)   | 84(3)  | -40(3)  | 13(3)  | -42(3)  |
| C(97)  | 60(3)  | 100(3)  | 55(2)  | -28(2)  | -21(2) | 25(2)   |
| C(106) | 83(3)  | 68(3)   | 99(4)  | -41(3)  | -42(3) | 13(2)   |
| C(32)  | 58(3)  | 191(6)  | 65(3)  | 16(4)   | -17(2) | -42(4)  |
| C(93)  | 52(3)  | 59(3)   | 137(4) | -16(3)  | -10(3) | 0(2)    |
| C(88)  | 71(3)  | 75(3)   | 57(2)  | -19(2)  | -17(2) | -13(2)  |
| C(96)  | 54(2)  | 87(3)   | 57(2)  | -16(2)  | -7(2)  | 16(2)   |
| C(82)  | 55(3)  | 165(6)  | 189(6) | -115(5) | -3(4)  | -5(3)   |
| C(83)  | 64(3)  | 79(3)   | 89(3)  | -39(2)  | -29(2) | 9(2)    |
| C(123) | 131(4) | 63(3)   | 53(2)  | -7(2)   | -33(3) | -4(3)   |
| C(112) | 252(8) | 98(4)   | 83(4)  | 13(3)   | -25(5) | -35(5)  |
| C(56)  | 75(3)  | 72(3)   | 78(3)  | -18(2)  | -38(3) | -6(2)   |
| C(122) | 169(6) | 54(3)   | 129(5) | -6(3)   | -31(4) | -14(3)  |
| C(113) | 177(5) | 37(2)   | 89(3)  | 2(2)    | -54(3) | 13(3)   |
| C(52)  | 86(4)  | 98(4)   | 111(4) | 56(3)   | -51(3) | -39(3)  |
| C(92)  | 96(4)  | 423(13) | 82(4)  | -118(6) | 22(3)  | -107(6) |
| C(126) | 175(6) | 150(6)  | 103(5) | -58(4)  | 8(4)   | 51(5)   |

---



Table S13. Crystal data and structure refinement for 4.

|                                   |                                                                                                                              |
|-----------------------------------|------------------------------------------------------------------------------------------------------------------------------|
| Identification code               | holjs18                                                                                                                      |
| Empirical formula                 | C84 H136 Cl2 Fe2 N6                                                                                                          |
| Formula weight                    | 1412.59                                                                                                                      |
| Temperature                       | 293(2) K                                                                                                                     |
| Wavelength                        | 0.71073 Å                                                                                                                    |
| Crystal system, space group       | Triclinic, P-1                                                                                                               |
| Unit cell dimensions              | a = 12.8392(7) Å alpha=113.493(1) deg.<br>b = 18.2881(10) Å beta = 97.623(1) deg.<br>c = 19.5619(11) Å gamma= 92.430(1) deg. |
| Volume                            | 4152.3(4) Å <sup>3</sup>                                                                                                     |
| Z, Calculated density             | 2, 1.130 Mg/m <sup>3</sup>                                                                                                   |
| Absorption coefficient            | 0.458 mm <sup>-1</sup>                                                                                                       |
| F(000)                            | 1536                                                                                                                         |
| Crystal size                      | 0.14 x 0.25 x 0.44 mm                                                                                                        |
| Theta range for data collection   | 1.15 to 23.29 deg.                                                                                                           |
| Limiting indices                  | -14<=h<=13, -16<=k<=20, -21<=l<=21                                                                                           |
| Reflections collected / unique    | 19223 / 11947 [R(int) = 0.0517]                                                                                              |
| Completeness to theta = 23.29     | 99.6 %                                                                                                                       |
| Refinement method                 | Full-matrix least-squares on F <sup>2</sup>                                                                                  |
| Data / restraints / parameters    | 11947 / 0 / 831                                                                                                              |
| Goodness-of-fit on F <sup>2</sup> | 1.018                                                                                                                        |
| Final R indices [I>2sigma(I)]     | R1 = 0.0757, wR2 = 0.1589                                                                                                    |
| R indices (all data)              | R1 = 0.1447, wR2 = 0.1822                                                                                                    |
| Largest diff. peak and hole       | 0.751 and -0.407 e.Å <sup>-3</sup>                                                                                           |

Table S14. Atomic coordinates ( $\times 10^4$ ) and equivalent isotropic displacement parameters ( $\text{Å}^2 \times 10^3$ ) for 4. U(eq) is defined as one third of the trace of the orthogonalized  $U_{ij}$  tensor.

|        | x        | y        | z        | U(eq) |
|--------|----------|----------|----------|-------|
| Fe(1)  | 3521(1)  | 933(1)   | 7307(1)  | 30(1) |
| Fe(2)  | 9974(1)  | 3935(1)  | 2972(1)  | 31(1) |
| Cl(1)  | 3097(1)  | 1422(1)  | 6445(1)  | 53(1) |
| Cl(2)  | 10041(1) | 3111(1)  | 3572(1)  | 49(1) |
| C(12)  | 2766(5)  | 2180(4)  | 8582(3)  | 33(2) |
| N(21)  | 4910(3)  | 513(3)   | 7448(3)  | 26(1) |
| C(65)  | 8620(5)  | 3463(4)  | 611(3)   | 39(2) |
| C(105) | 9284(5)  | 3155(5)  | -38(4)   | 62(2) |
| C(25)  | 12015(5) | 4932(4)  | 1804(4)  | 42(2) |
| N(11)  | 3393(3)  | 1507(3)  | 8395(3)  | 29(1) |
| C(16)  | 12050(4) | 4760(4)  | 3333(3)  | 31(2) |
| C(23)  | 5217(5)  | -468(4)  | 6206(3)  | 33(2) |
| C(102) | 4466(5)  | 3143(4)  | 9123(4)  | 42(2) |
| C(31)  | 3911(5)  | 1259(3)  | 8898(3)  | 30(2) |
| C(66)  | 12127(5) | 5551(4)  | 3904(4)  | 39(2) |
| C(13)  | 5440(4)  | 298(4)   | 6800(3)  | 30(2) |
| N(12)  | 11161(3) | 4487(3)  | 2732(3)  | 27(1) |
| C(55)  | 9328(4)  | 3695(3)  | 1391(3)  | 28(1) |
| C(106) | 11316(5) | 6131(4)  | 3929(4)  | 42(2) |
| C(111) | 6960(5)  | 611(4)   | 8997(4)  | 54(2) |
| C(22)  | 1661(5)  | 2032(4)  | 8376(4)  | 39(2) |
| N(22)  | 9137(3)  | 3455(3)  | 1927(3)  | 30(1) |
| C(26)  | 12778(5) | 4227(4)  | 3384(3)  | 36(2) |
| C(61)  | 6257(5)  | 39(3)    | 8245(3)  | 34(2) |
| N(14)  | 2509(4)  | -111(3)  | 7001(3)  | 42(1) |
| C(62)  | 3277(5)  | 2961(4)  | 8912(3)  | 36(2) |
| C(56)  | 13005(6) | 5806(4)  | 4472(4)  | 56(2) |
| C(85)  | 11592(6) | 5614(5)  | 1616(5)  | 70(2) |
| C(51)  | 5259(4)  | 452(3)   | 8091(3)  | 28(1) |
| C(35)  | 11123(4) | 4545(3)  | 2063(4)  | 31(2) |
| C(63)  | 6100(5)  | 894(4)   | 6731(4)  | 35(2) |
| C(116) | 11714(6) | 6834(4)  | 3759(4)  | 66(2) |
| C(42)  | 1586(6)  | 3468(4)  | 8866(4)  | 56(2) |
| C(71)  | 6985(5)  | -205(4)  | 7658(4)  | 45(2) |
| C(52)  | 2657(6)  | 3596(4)  | 9050(4)  | 47(2) |
| C(72)  | 1063(5)  | 1207(4)  | 8013(4)  | 41(2) |
| C(75)  | 7690(5)  | 2822(4)  | 394(4)   | 47(2) |
| C(14)  | 1977(5)  | -675(5)  | 6861(4)  | 46(2) |
| C(32)  | 1082(5)  | 2696(5)  | 8525(4)  | 49(2) |
| N(18)  | 9247(4)  | 4813(3)  | 3753(3)  | 43(1) |
| C(93)  | 3504(5)  | -1329(4) | 5569(4)  | 56(2) |
| C(91)  | 4676(5)  | 1771(4)  | 10306(3) | 47(2) |
| C(53)  | 6577(5)  | 678(4)   | 6099(4)  | 48(2) |
| C(67)  | 7471(5)  | 2869(4)  | 2090(3)  | 37(2) |
| C(117) | 6163(5)  | 3856(4)  | 2004(4)  | 59(2) |
| C(73)  | 4448(5)  | -1116(4) | 6213(3)  | 37(2) |
| C(97)  | 10560(5) | 1544(4)  | 1725(4)  | 59(2) |
| C(103) | 6283(5)  | 1746(4)  | 7315(4)  | 44(2) |
| C(17)  | 8431(5)  | 2762(3)  | 1804(3)  | 31(2) |
| C(77)  | 9835(5)  | 1846(4)  | 1230(4)  | 41(2) |
| C(37)  | 8104(5)  | 1347(4)  | 1414(4)  | 45(2) |
| C(76)  | 12672(5) | 3358(4)  | 2840(4)  | 44(2) |
| C(21)  | 3663(5)  | 1464(3)  | 9713(3)  | 34(2) |
| C(41)  | 4705(5)  | 749(3)   | 8711(3)  | 31(2) |

|        |          |          |          |        |
|--------|----------|----------|----------|--------|
| C(15)  | 13062(5) | 5278(4)  | 2351(4)  | 47(2)  |
| C(33)  | 5710(5)  | -643(4)  | 5573(4)  | 45(2)  |
| C(27)  | 8770(5)  | 2000(4)  | 1489(3)  | 37(2)  |
| C(18)  | 8788(5)  | 5197(4)  | 4196(4)  | 41(2)  |
| C(45)  | 10221(5) | 4227(3)  | 1500(3)  | 33(2)  |
| C(101) | 5847(5)  | -731(4)  | 8319(4)  | 50(2)  |
| C(82)  | 253(6)   | 1090(4)  | 8480(5)  | 66(2)  |
| C(107) | 7099(5)  | 3688(4)  | 2485(4)  | 42(2)  |
| C(11)  | 2870(5)  | 2082(4)  | 10002(4) | 48(2)  |
| C(57)  | 6845(5)  | 2192(4)  | 1995(4)  | 49(2)  |
| C(43)  | 6384(6)  | -77(5)   | 5517(4)  | 55(2)  |
| C(81)  | 3154(6)  | 680(4)   | 9698(4)  | 54(2)  |
| C(96)  | 12728(6) | 2814(4)  | 3263(4)  | 62(2)  |
| C(123) | 6025(5)  | 2334(4)  | 6953(4)  | 57(2)  |
| C(28)  | 8197(5)  | 5690(4)  | 4760(4)  | 57(2)  |
| C(46)  | 13750(6) | 5297(5)  | 4497(4)  | 63(2)  |
| C(92)  | 538(5)   | 1030(4)  | 7210(4)  | 58(2)  |
| C(112) | 4838(6)  | 3761(4)  | 9930(4)  | 61(2)  |
| C(95)  | 12304(5) | 4280(5)  | 1081(4)  | 71(2)  |
| C(47)  | 7141(5)  | 1437(4)  | 1654(4)  | 53(2)  |
| C(115) | 8151(6)  | 4224(4)  | 615(4)   | 62(2)  |
| C(36)  | 13636(5) | 4516(4)  | 3956(4)  | 55(2)  |
| C(127) | 6812(5)  | 3796(4)  | 3256(4)  | 60(2)  |
| C(126) | 10947(6) | 6463(4)  | 4696(4)  | 59(2)  |
| C(24)  | 1279(6)  | -1405(4) | 6683(4)  | 70(2)  |
| C(83)  | 4948(5)  | -1885(4) | 6139(4)  | 57(2)  |
| C(122) | 4903(6)  | 3442(5)  | 8579(4)  | 67(2)  |
| C(87)  | 9749(6)  | 1258(4)  | 402(4)   | 65(2)  |
| C(113) | 7437(6)  | 1980(5)  | 7732(5)  | 87(3)  |
| C(86)  | 13534(7) | 3173(5)  | 2334(5)  | 87(3)  |
| C(8S)  | 7070(5)  | 6091(4)  | 3338(4)  | 39(2)  |
| C(3S)  | 9573(5)  | 8654(4)  | 5283(4)  | 41(2)  |
| C(4S)  | 9750(7)  | 8708(6)  | 4643(6)  | 98(3)  |
| C(5S)  | 10870(7) | 9040(5)  | 4707(5)  | 91(3)  |
| C(10S) | 8592(8)  | 6164(6)  | 2864(6)  | 126(4) |
| C(2S)  | 8510(9)  | 8344(7)  | 5249(7)  | 139(4) |
| C(1S)  | 8313(9)  | 8592(7)  | 5990(7)  | 138(4) |
| C(9S)  | 7519(9)  | 6245(7)  | 2845(7)  | 132(4) |
| C(7S)  | 6081(10) | 6306(8)  | 3346(8)  | 153(5) |
| C(6S)  | 5684(9)  | 6474(7)  | 4010(7)  | 139(4) |

---

Table S15. Bond lengths [Å] and angles [deg] for 4.

---

|               |            |
|---------------|------------|
| Fe(1)-N(11)   | 1.996(5)   |
| Fe(1)-N(21)   | 2.001(4)   |
| Fe(1)-N(14)   | 2.090(6)   |
| Fe(1)-Cl(1)   | 2.2224(18) |
| Fe(2)-N(12)   | 2.000(4)   |
| Fe(2)-N(22)   | 2.002(5)   |
| Fe(2)-N(18)   | 2.081(6)   |
| Fe(2)-Cl(2)   | 2.2471(17) |
| C(12)-C(62)   | 1.400(8)   |
| C(12)-C(22)   | 1.407(8)   |
| C(12)-N(11)   | 1.450(7)   |
| N(21)-C(51)   | 1.326(7)   |
| N(21)-C(13)   | 1.443(7)   |
| C(65)-C(75)   | 1.525(8)   |
| C(65)-C(115)  | 1.538(8)   |
| C(65)-C(105)  | 1.553(9)   |
| C(65)-C(55)   | 1.555(8)   |
| C(25)-C(15)   | 1.535(8)   |
| C(25)-C(85)   | 1.536(9)   |
| C(25)-C(95)   | 1.545(9)   |
| C(25)-C(35)   | 1.563(8)   |
| N(11)-C(31)   | 1.351(7)   |
| C(16)-C(26)   | 1.402(8)   |
| C(16)-C(66)   | 1.422(8)   |
| C(16)-N(12)   | 1.436(7)   |
| C(23)-C(33)   | 1.396(8)   |
| C(23)-C(13)   | 1.404(8)   |
| C(23)-C(73)   | 1.517(8)   |
| C(102)-C(62)  | 1.514(8)   |
| C(102)-C(112) | 1.526(9)   |
| C(102)-C(122) | 1.532(9)   |
| C(31)-C(41)   | 1.397(7)   |
| C(31)-C(21)   | 1.566(8)   |
| C(66)-C(56)   | 1.391(9)   |
| C(66)-C(106)  | 1.508(8)   |
| C(13)-C(63)   | 1.413(8)   |
| N(12)-C(35)   | 1.348(7)   |
| C(55)-N(22)   | 1.334(7)   |
| C(55)-C(45)   | 1.408(8)   |
| C(106)-C(126) | 1.526(9)   |
| C(106)-C(116) | 1.534(8)   |
| C(111)-C(61)  | 1.554(8)   |
| C(22)-C(32)   | 1.401(8)   |
| C(22)-C(72)   | 1.509(9)   |
| N(22)-C(17)   | 1.444(7)   |
| C(26)-C(36)   | 1.377(8)   |
| C(26)-C(76)   | 1.506(9)   |
| C(61)-C(71)   | 1.518(8)   |
| C(61)-C(101)  | 1.548(8)   |
| C(61)-C(51)   | 1.570(8)   |
| N(14)-C(14)   | 1.127(8)   |
| C(62)-C(52)   | 1.394(8)   |
| C(56)-C(46)   | 1.372(9)   |
| C(51)-C(41)   | 1.419(8)   |
| C(35)-C(45)   | 1.410(8)   |
| C(63)-C(53)   | 1.376(8)   |
| C(63)-C(103)  | 1.507(9)   |
| C(42)-C(52)   | 1.360(9)   |
| C(42)-C(32)   | 1.383(9)   |
| C(72)-C(92)   | 1.522(9)   |
| C(72)-C(82)   | 1.533(9)   |

|                     |            |
|---------------------|------------|
| C(14)-C(24)         | 1.468(10)  |
| N(18)-C(18)         | 1.130(8)   |
| C(93)-C(73)         | 1.541(8)   |
| C(91)-C(21)         | 1.539(8)   |
| C(53)-C(43)         | 1.381(9)   |
| C(67)-C(57)         | 1.380(8)   |
| C(67)-C(17)         | 1.409(8)   |
| C(67)-C(107)        | 1.518(8)   |
| C(117)-C(107)       | 1.544(8)   |
| C(73)-C(83)         | 1.532(8)   |
| C(97)-C(77)         | 1.529(8)   |
| C(103)-C(123)       | 1.531(8)   |
| C(103)-C(113)       | 1.546(9)   |
| C(17)-C(27)         | 1.395(8)   |
| C(77)-C(27)         | 1.521(8)   |
| C(77)-C(87)         | 1.531(9)   |
| C(37)-C(47)         | 1.373(9)   |
| C(37)-C(27)         | 1.386(8)   |
| C(76)-C(96)         | 1.525(8)   |
| C(76)-C(86)         | 1.541(9)   |
| C(21)-C(81)         | 1.537(8)   |
| C(21)-C(11)         | 1.542(8)   |
| C(33)-C(43)         | 1.367(9)   |
| C(18)-C(28)         | 1.447(10)  |
| C(107)-C(127)       | 1.538(9)   |
| C(57)-C(47)         | 1.370(9)   |
| C(46)-C(36)         | 1.386(10)  |
| C(8S)-C(9S)         | 1.300(11)  |
| C(8S)-C(7S)         | 1.345(12)  |
| C(3S)-C(4S)         | 1.342(10)  |
| C(3S)-C(2S)         | 1.439(12)  |
| C(4S)-C(5S)         | 1.506(11)  |
| C(10S)-C(9S)        | 1.390(12)  |
| C(2S)-C(1S)         | 1.397(14)  |
| C(7S)-C(6S)         | 1.384(14)  |
|                     |            |
| N(11)-Fe(1)-N(21)   | 98.01(18)  |
| N(11)-Fe(1)-N(14)   | 101.0(2)   |
| N(21)-Fe(1)-N(14)   | 99.56(19)  |
| N(11)-Fe(1)-Cl(1)   | 123.80(14) |
| N(21)-Fe(1)-Cl(1)   | 122.81(14) |
| N(14)-Fe(1)-Cl(1)   | 107.39(16) |
| N(12)-Fe(2)-N(22)   | 96.54(19)  |
| N(12)-Fe(2)-N(18)   | 107.66(19) |
| N(22)-Fe(2)-N(18)   | 113.8(2)   |
| N(12)-Fe(2)-Cl(2)   | 129.08(14) |
| N(22)-Fe(2)-Cl(2)   | 114.46(14) |
| N(18)-Fe(2)-Cl(2)   | 95.85(16)  |
| C(62)-C(12)-C(22)   | 121.5(6)   |
| C(62)-C(12)-N(11)   | 119.3(5)   |
| C(22)-C(12)-N(11)   | 119.0(6)   |
| C(51)-N(21)-C(13)   | 126.3(5)   |
| C(51)-N(21)-Fe(1)   | 120.3(4)   |
| C(13)-N(21)-Fe(1)   | 113.4(3)   |
| C(75)-C(65)-C(115)  | 106.5(5)   |
| C(75)-C(65)-C(105)  | 105.8(5)   |
| C(115)-C(65)-C(105) | 108.8(6)   |
| C(75)-C(65)-C(55)   | 117.3(5)   |
| C(115)-C(65)-C(55)  | 107.3(5)   |
| C(105)-C(65)-C(55)  | 110.7(5)   |
| C(15)-C(25)-C(85)   | 107.0(5)   |
| C(15)-C(25)-C(95)   | 105.8(5)   |
| C(85)-C(25)-C(95)   | 108.9(6)   |
| C(15)-C(25)-C(35)   | 118.0(5)   |
| C(85)-C(25)-C(35)   | 108.9(5)   |

|                      |          |
|----------------------|----------|
| C(95)-C(25)-C(35)    | 107.9(5) |
| C(31)-N(11)-C(12)    | 125.1(5) |
| C(31)-N(11)-Fe(1)    | 118.5(4) |
| C(12)-N(11)-Fe(1)    | 116.4(3) |
| C(26)-C(16)-C(66)    | 120.9(6) |
| C(26)-C(16)-N(12)    | 119.8(5) |
| C(66)-C(16)-N(12)    | 119.1(5) |
| C(33)-C(23)-C(13)    | 119.0(6) |
| C(33)-C(23)-C(73)    | 117.9(6) |
| C(13)-C(23)-C(73)    | 123.0(5) |
| C(62)-C(102)-C(112)  | 113.9(5) |
| C(62)-C(102)-C(122)  | 109.9(5) |
| C(112)-C(102)-C(122) | 108.6(6) |
| N(11)-C(31)-C(41)    | 121.5(5) |
| N(11)-C(31)-C(21)    | 125.0(5) |
| C(41)-C(31)-C(21)    | 113.4(5) |
| C(56)-C(66)-C(16)    | 117.9(6) |
| C(56)-C(66)-C(106)   | 118.1(6) |
| C(16)-C(66)-C(106)   | 124.0(6) |
| C(23)-C(13)-C(63)    | 120.0(6) |
| C(23)-C(13)-N(21)    | 120.6(5) |
| C(63)-C(13)-N(21)    | 119.0(5) |
| C(35)-N(12)-C(16)    | 125.6(5) |
| C(35)-N(12)-Fe(2)    | 122.5(4) |
| C(16)-N(12)-Fe(2)    | 111.8(3) |
| N(22)-C(55)-C(45)    | 121.3(5) |
| N(22)-C(55)-C(65)    | 126.2(5) |
| C(45)-C(55)-C(65)    | 112.5(5) |
| C(66)-C(106)-C(126)  | 111.0(6) |
| C(66)-C(106)-C(116)  | 113.2(5) |
| C(126)-C(106)-C(116) | 108.9(5) |
| C(32)-C(22)-C(12)    | 117.6(6) |
| C(32)-C(22)-C(72)    | 118.2(6) |
| C(12)-C(22)-C(72)    | 124.1(6) |
| C(55)-N(22)-C(17)    | 124.9(5) |
| C(55)-N(22)-Fe(2)    | 122.4(4) |
| C(17)-N(22)-Fe(2)    | 112.1(4) |
| C(36)-C(26)-C(16)    | 118.2(6) |
| C(36)-C(26)-C(76)    | 118.6(6) |
| C(16)-C(26)-C(76)    | 123.1(5) |
| C(71)-C(61)-C(101)   | 107.4(5) |
| C(71)-C(61)-C(111)   | 105.8(5) |
| C(101)-C(61)-C(111)  | 109.6(5) |
| C(71)-C(61)-C(51)    | 117.7(5) |
| C(101)-C(61)-C(51)   | 106.8(5) |
| C(111)-C(61)-C(51)   | 109.5(5) |
| C(14)-N(14)-Fe(1)    | 177.4(6) |
| C(52)-C(62)-C(12)    | 118.1(6) |
| C(52)-C(62)-C(102)   | 119.0(6) |
| C(12)-C(62)-C(102)   | 123.0(5) |
| C(46)-C(56)-C(66)    | 121.0(7) |
| N(21)-C(51)-C(41)    | 120.7(5) |
| N(21)-C(51)-C(61)    | 125.9(5) |
| C(41)-C(51)-C(61)    | 113.4(5) |
| N(12)-C(35)-C(45)    | 120.9(5) |
| N(12)-C(35)-C(25)    | 126.9(5) |
| C(45)-C(35)-C(25)    | 112.2(5) |
| C(53)-C(63)-C(13)    | 117.9(6) |
| C(53)-C(63)-C(103)   | 119.7(6) |
| C(13)-C(63)-C(103)   | 122.4(5) |
| C(52)-C(42)-C(32)    | 120.4(7) |
| C(42)-C(52)-C(62)    | 121.5(7) |
| C(22)-C(72)-C(92)    | 110.6(6) |
| C(22)-C(72)-C(82)    | 112.4(5) |
| C(92)-C(72)-C(82)    | 111.0(6) |

|                      |           |
|----------------------|-----------|
| N(14)-C(14)-C(24)    | 179.5(9)  |
| C(42)-C(32)-C(22)    | 120.9(6)  |
| C(18)-N(18)-Fe(2)    | 169.7(5)  |
| C(63)-C(53)-C(43)    | 122.6(6)  |
| C(57)-C(67)-C(17)    | 117.9(6)  |
| C(57)-C(67)-C(107)   | 119.2(6)  |
| C(17)-C(67)-C(107)   | 122.9(5)  |
| C(23)-C(73)-C(83)    | 113.4(5)  |
| C(23)-C(73)-C(93)    | 110.2(5)  |
| C(83)-C(73)-C(93)    | 108.6(5)  |
| C(63)-C(103)-C(123)  | 110.8(6)  |
| C(63)-C(103)-C(113)  | 112.5(6)  |
| C(123)-C(103)-C(113) | 107.8(5)  |
| C(27)-C(17)-C(67)    | 120.6(5)  |
| C(27)-C(17)-N(22)    | 119.3(5)  |
| C(67)-C(17)-N(22)    | 119.6(5)  |
| C(27)-C(77)-C(97)    | 111.9(5)  |
| C(27)-C(77)-C(87)    | 113.3(5)  |
| C(97)-C(77)-C(87)    | 109.1(6)  |
| C(47)-C(37)-C(27)    | 121.6(6)  |
| C(26)-C(76)-C(96)    | 110.8(6)  |
| C(26)-C(76)-C(86)    | 112.3(6)  |
| C(96)-C(76)-C(86)    | 108.5(6)  |
| C(81)-C(21)-C(91)    | 110.3(5)  |
| C(81)-C(21)-C(11)    | 105.2(5)  |
| C(91)-C(21)-C(11)    | 106.2(5)  |
| C(81)-C(21)-C(31)    | 106.0(5)  |
| C(91)-C(21)-C(31)    | 111.3(5)  |
| C(11)-C(21)-C(31)    | 117.5(5)  |
| C(31)-C(41)-C(51)    | 134.8(5)  |
| C(43)-C(33)-C(23)    | 121.0(7)  |
| C(37)-C(27)-C(17)    | 118.4(6)  |
| C(37)-C(27)-C(77)    | 117.9(6)  |
| C(17)-C(27)-C(77)    | 123.6(5)  |
| N(18)-C(18)-C(28)    | 179.7(9)  |
| C(55)-C(45)-C(35)    | 133.9(5)  |
| C(67)-C(107)-C(127)  | 111.1(5)  |
| C(67)-C(107)-C(117)  | 113.1(6)  |
| C(127)-C(107)-C(117) | 110.1(5)  |
| C(47)-C(57)-C(67)    | 122.2(6)  |
| C(33)-C(43)-C(53)    | 119.3(6)  |
| C(56)-C(46)-C(36)    | 120.3(7)  |
| C(57)-C(47)-C(37)    | 119.2(6)  |
| C(26)-C(36)-C(46)    | 121.4(7)  |
| C(9S)-C(8S)-C(7S)    | 111.6(9)  |
| C(4S)-C(3S)-C(2S)    | 113.8(8)  |
| C(3S)-C(4S)-C(5S)    | 111.8(8)  |
| C(1S)-C(2S)-C(3S)    | 107.7(10) |
| C(8S)-C(9S)-C(10S)   | 116.8(10) |
| C(8S)-C(7S)-C(6S)    | 116.4(11) |

---

Table S16. Anisotropic displacement parameters ( $\text{\AA}^2 \times 10^3$ ) for 4.  
The anisotropic displacement factor exponent takes the form:  
 $-2 \pi^2 [ h^2 a^{*2} U_{11} + \dots + 2 h k a^* b^* U_{12} ]$

|        | U11   | U22   | U33   | U23   | U13   | U12    |
|--------|-------|-------|-------|-------|-------|--------|
| Fe(1)  | 32(1) | 31(1) | 26(1) | 12(1) | 4(1)  | 5(1)   |
| Fe(2)  | 32(1) | 32(1) | 28(1) | 10(1) | 5(1)  | -6(1)  |
| Cl(1)  | 55(1) | 70(1) | 47(1) | 36(1) | 6(1)  | 10(1)  |
| Cl(2)  | 64(1) | 44(1) | 42(1) | 22(1) | 5(1)  | -5(1)  |
| C(12)  | 41(4) | 41(4) | 18(4) | 9(3)  | 14(3) | 15(3)  |
| N(21)  | 28(3) | 24(3) | 22(3) | 7(2)  | 0(2)  | 0(2)   |
| C(65)  | 36(4) | 40(4) | 31(4) | 12(3) | -8(3) | -6(3)  |
| C(105) | 51(5) | 94(6) | 30(5) | 15(4) | 2(4)  | -8(4)  |
| C(25)  | 44(4) | 41(4) | 35(4) | 11(3) | 9(3)  | -13(3) |
| N(11)  | 29(3) | 29(3) | 30(3) | 15(3) | 4(2)  | 5(2)   |
| C(16)  | 26(3) | 38(4) | 24(4) | 10(3) | 2(3)  | -8(3)  |
| C(23)  | 39(4) | 34(4) | 25(4) | 7(3)  | 7(3)  | 12(3)  |
| C(102) | 52(4) | 26(4) | 49(5) | 14(3) | 12(4) | 7(3)   |
| C(31)  | 33(4) | 28(4) | 26(4) | 9(3)  | 5(3)  | -2(3)  |
| C(66)  | 33(4) | 39(4) | 37(4) | 8(3)  | 6(3)  | -11(3) |
| C(13)  | 26(3) | 34(4) | 29(4) | 13(3) | -1(3) | 7(3)   |
| N(12)  | 24(3) | 25(3) | 25(3) | 3(2)  | 6(2)  | -4(2)  |
| C(55)  | 28(3) | 25(3) | 23(4) | 2(3)  | 2(3)  | 2(3)   |
| C(106) | 43(4) | 33(4) | 38(4) | 3(3)  | 12(3) | -7(3)  |
| C(111) | 46(4) | 58(5) | 44(5) | 11(4) | -7(4) | 5(4)   |
| C(22)  | 40(4) | 46(4) | 37(4) | 20(4) | 14(3) | 19(4)  |
| N(22)  | 31(3) | 22(3) | 32(3) | 8(2)  | 4(2)  | -4(2)  |
| C(26)  | 28(4) | 46(4) | 30(4) | 13(3) | 1(3)  | -3(3)  |
| C(61)  | 35(4) | 30(4) | 35(4) | 15(3) | 1(3)  | 8(3)   |
| N(14)  | 36(3) | 37(4) | 45(4) | 9(3)  | 6(3)  | -4(3)  |
| C(62)  | 44(4) | 35(4) | 32(4) | 14(3) | 13(3) | 7(3)   |
| C(56)  | 57(5) | 49(5) | 37(5) | -3(4) | -1(4) | -23(4) |
| C(85)  | 67(5) | 71(6) | 91(7) | 59(5) | -1(5) | -20(4) |
| C(51)  | 33(4) | 23(3) | 25(4) | 10(3) | 2(3)  | -3(3)  |
| C(35)  | 31(4) | 20(3) | 36(4) | 4(3)  | 9(3)  | -1(3)  |
| C(63)  | 31(4) | 43(4) | 35(4) | 19(3) | 12(3) | 6(3)   |
| C(116) | 88(6) | 43(5) | 71(6) | 19(4) | 34(5) | 9(4)   |
| C(42)  | 66(6) | 47(5) | 61(5) | 25(4) | 22(4) | 24(4)  |
| C(71)  | 41(4) | 46(4) | 51(5) | 25(4) | 3(4)  | 16(3)  |
| C(52)  | 57(5) | 36(4) | 51(5) | 18(4) | 15(4) | 10(4)  |
| C(72)  | 37(4) | 38(4) | 41(4) | 7(3)  | 13(3) | 7(3)   |
| C(75)  | 38(4) | 60(5) | 33(4) | 16(4) | -8(3) | -3(4)  |
| C(14)  | 41(4) | 56(5) | 40(5) | 18(4) | 7(4)  | 14(4)  |
| C(32)  | 36(4) | 69(6) | 46(5) | 24(4) | 15(4) | 17(4)  |
| N(18)  | 46(4) | 34(3) | 41(4) | 5(3)  | 15(3) | -3(3)  |
| C(93)  | 49(5) | 50(5) | 51(5) | 4(4)  | 8(4)  | 0(4)   |
| C(91)  | 67(5) | 49(4) | 19(4) | 7(3)  | 8(4)  | 7(4)   |
| C(53)  | 51(5) | 49(5) | 55(5) | 26(4) | 24(4) | 9(4)   |
| C(67)  | 30(4) | 37(4) | 32(4) | 6(3)  | 2(3)  | -12(3) |
| C(117) | 47(5) | 63(5) | 59(5) | 15(4) | 9(4)  | 16(4)  |
| C(73)  | 42(4) | 33(4) | 26(4) | 1(3)  | 3(3)  | 2(3)   |
| C(97)  | 60(5) | 58(5) | 50(5) | 14(4) | 5(4)  | 7(4)   |
| C(103) | 49(4) | 41(4) | 47(5) | 25(4) | 11(4) | -3(3)  |
| C(17)  | 33(4) | 26(4) | 25(4) | 5(3)  | -2(3) | -6(3)  |
| C(77)  | 43(4) | 33(4) | 40(4) | 7(3)  | 9(3)  | -1(3)  |
| C(37)  | 49(5) | 26(4) | 42(4) | -4(3) | 4(4)  | -6(3)  |
| C(76)  | 33(4) | 44(4) | 55(5) | 22(4) | 4(3)  | 6(3)   |
| C(21)  | 48(4) | 29(4) | 22(4) | 7(3)  | 9(3)  | 2(3)   |
| C(41)  | 41(4) | 31(4) | 27(4) | 19(3) | 1(3)  | 4(3)   |
| C(15)  | 41(4) | 45(4) | 45(5) | 8(4)  | 15(3) | -15(3) |



|        |        |       |        |       |        |        |
|--------|--------|-------|--------|-------|--------|--------|
| C(33)  | 51(5)  | 47(5) | 31(4)  | 9(4)  | 7(4)   | 13(4)  |
| C(27)  | 42(4)  | 33(4) | 30(4)  | 9(3)  | -1(3)  | -5(3)  |
| C(18)  | 44(4)  | 38(4) | 37(5)  | 14(4) | -1(4)  | -5(4)  |
| C(45)  | 39(4)  | 34(4) | 27(4)  | 15(3) | 1(3)   | -4(3)  |
| C(101) | 54(5)  | 49(5) | 55(5)  | 29(4) | 12(4)  | 18(4)  |
| C(82)  | 55(5)  | 62(5) | 78(6)  | 23(5) | 22(4)  | -7(4)  |
| C(107) | 32(4)  | 44(4) | 40(4)  | 9(3)  | 8(3)   | -4(3)  |
| C(11)  | 68(5)  | 44(4) | 32(4)  | 12(3) | 20(4)  | 10(4)  |
| C(57)  | 36(4)  | 53(5) | 55(5)  | 20(4) | 6(4)   | -13(4) |
| C(43)  | 67(5)  | 68(6) | 42(5)  | 27(4) | 32(4)  | 29(5)  |
| C(81)  | 80(5)  | 45(5) | 42(5)  | 20(4) | 23(4)  | -2(4)  |
| C(96)  | 65(5)  | 44(5) | 79(6)  | 27(4) | 8(4)   | 21(4)  |
| C(123) | 56(5)  | 48(5) | 77(6)  | 30(4) | 31(4)  | 12(4)  |
| C(28)  | 49(5)  | 61(5) | 47(5)  | 5(4)  | 10(4)  | 6(4)   |
| C(46)  | 44(5)  | 74(6) | 54(6)  | 17(5) | -18(4) | -6(4)  |
| C(92)  | 43(4)  | 71(5) | 49(5)  | 15(4) | 6(4)   | 6(4)   |
| C(112) | 61(5)  | 55(5) | 59(6)  | 17(4) | 2(4)   | -10(4) |
| C(95)  | 46(5)  | 90(6) | 51(5)  | 1(5)  | 22(4)  | -21(4) |
| C(47)  | 46(5)  | 37(5) | 64(5)  | 12(4) | 3(4)   | -21(4) |
| C(115) | 61(5)  | 58(5) | 67(6)  | 35(4) | -18(4) | -8(4)  |
| C(36)  | 40(4)  | 55(5) | 57(5)  | 15(4) | -6(4)  | 6(4)   |
| C(127) | 54(5)  | 59(5) | 50(5)  | 2(4)  | 14(4)  | -7(4)  |
| C(126) | 58(5)  | 48(5) | 53(5)  | 0(4)  | 18(4)  | -10(4) |
| C(24)  | 74(6)  | 58(5) | 70(6)  | 25(5) | 1(5)   | -30(4) |
| C(83)  | 63(5)  | 36(4) | 67(6)  | 16(4) | 10(4)  | 4(4)   |
| C(122) | 54(5)  | 84(6) | 66(6)  | 30(5) | 24(4)  | 0(4)   |
| C(87)  | 62(5)  | 74(6) | 52(5)  | 14(4) | 15(4)  | 17(4)  |
| C(113) | 87(7)  | 50(5) | 105(8) | 28(5) | -30(6) | -14(5) |
| C(86)  | 113(8) | 66(6) | 93(7)  | 25(5) | 71(6)  | 30(5)  |

---

Table S17. Crystal data and structure refinement for 5.

\*Note: 30s/Frame data to 56.5 deg.

|                                   |                                                                                                                       |
|-----------------------------------|-----------------------------------------------------------------------------------------------------------------------|
| Identification code               | holjs46                                                                                                               |
| Empirical formula                 | C36 H53 F3 Fe N2 O3 S                                                                                                 |
| Formula weight                    | 706.71                                                                                                                |
| Temperature                       | 293(2) K                                                                                                              |
| Wavelength                        | 0.71073 Å                                                                                                             |
| Crystal system                    | Monoclinic                                                                                                            |
| Space group                       | P2(1)/n                                                                                                               |
| Unit cell dimensions              | a = 9.7581(12) Å    alpha = 90 deg.<br>b = 17.336(2) Å    beta = 95.194(2) deg.<br>c = 21.989(3) Å    gamma = 90 deg. |
| Volume, Z                         | 3704.4(8) Å <sup>3</sup> , 4                                                                                          |
| Density (calculated)              | 1.267 Mg/m <sup>3</sup>                                                                                               |
| Absorption coefficient            | 0.514 mm <sup>-1</sup>                                                                                                |
| F(000)                            | 1504                                                                                                                  |
| Crystal size                      | 0.14 x 0.18 x 0.18 mm                                                                                                 |
| Theta range for data collection   | 1.50 to 28.25 deg.                                                                                                    |
| Limiting indices                  | -12<=h<=11, -18<=k<=23, -29<=l<=28                                                                                    |
| Reflections collected             | 21706                                                                                                                 |
| Independent reflections           | 8649 [R(int) = 0.0488]                                                                                                |
| Reflections >2Sig(I)              | 5578                                                                                                                  |
| Absorption correction             | Empirical; SADABS                                                                                                     |
| Max. and min. transmission        | 0.928 and 0.839                                                                                                       |
| Refinement method                 | Full-matrix least-squares on F <sup>2</sup>                                                                           |
| Data / restraints / parameters    | 8649 / 0 / 415                                                                                                        |
| Goodness-of-fit on F <sup>2</sup> | 1.143                                                                                                                 |
| Final R indices [I>2sigma(I)]     | R1 = 0.0984, wR2 = 0.1662                                                                                             |
| R indices (all data)              | R1 = 0.1635, wR2 = 0.1892                                                                                             |
| Largest diff. peak and hole       | 0.433 and -0.492 e.Å <sup>-3</sup>                                                                                    |

Table S18. Atomic coordinates (  $\times 10^4$ ) and equivalent isotropic displacement parameters ( $\text{Å}^2 \times 10^3$ ) for 5.  $U(\text{eq})$  is defined as one third of the trace of the orthogonalized  $U_{ij}$  tensor.

|        | x        | y       | z       | U(eq)  |
|--------|----------|---------|---------|--------|
| Fe(1)  | 9159(1)  | 2485(1) | 6303(1) | 31(1)  |
| N(11)  | 7882(3)  | 2583(2) | 5566(1) | 23(1)  |
| N(21)  | 9116(3)  | 3579(2) | 6527(1) | 26(1)  |
| C(11)  | 6205(4)  | 3306(2) | 4794(2) | 28(1)  |
| C(21)  | 7251(4)  | 3230(2) | 5365(2) | 24(1)  |
| C(31)  | 7531(4)  | 3933(2) | 5679(2) | 27(1)  |
| C(41)  | 8384(4)  | 4118(2) | 6202(2) | 26(1)  |
| C(51)  | 8369(4)  | 5009(2) | 6359(2) | 35(1)  |
| C(61)  | 5855(4)  | 2568(2) | 4424(2) | 41(1)  |
| C(71)  | 4833(4)  | 3601(3) | 5002(2) | 42(1)  |
| C(81)  | 6758(5)  | 3891(3) | 4354(2) | 44(1)  |
| C(91)  | 6891(5)  | 5232(3) | 6491(2) | 50(1)  |
| C(101) | 8738(5)  | 5467(2) | 5789(2) | 47(1)  |
| C(111) | 9339(5)  | 5300(2) | 6891(2) | 42(1)  |
| C(12)  | 7827(4)  | 1824(2) | 5290(2) | 25(1)  |
| C(22)  | 6932(4)  | 1263(2) | 5501(2) | 30(1)  |
| C(32)  | 7062(5)  | 511(2)  | 5296(2) | 39(1)  |
| C(42)  | 8027(5)  | 319(2)  | 4899(2) | 42(1)  |
| C(52)  | 8870(4)  | 876(2)  | 4692(2) | 40(1)  |
| C(62)  | 8794(4)  | 1640(2) | 4876(2) | 29(1)  |
| C(72)  | 5805(4)  | 1467(3) | 5906(2) | 40(1)  |
| C(82)  | 4388(5)  | 1263(4) | 5633(3) | 78(2)  |
| C(92)  | 5980(6)  | 1098(5) | 6533(3) | 102(3) |
| C(102) | 9726(4)  | 2244(3) | 4622(2) | 36(1)  |
| C(112) | 9516(5)  | 2284(3) | 3919(2) | 51(1)  |
| C(122) | 11254(5) | 2090(3) | 4812(2) | 57(1)  |
| C(13)  | 9885(4)  | 3695(2) | 7112(2) | 27(1)  |
| C(23)  | 9184(4)  | 3702(2) | 7643(2) | 33(1)  |
| C(33)  | 9953(5)  | 3830(3) | 8195(2) | 46(1)  |
| C(43)  | 11350(5) | 3943(3) | 8228(2) | 46(1)  |
| C(53)  | 12033(5) | 3873(3) | 7714(2) | 41(1)  |
| C(63)  | 11340(4) | 3725(2) | 7143(2) | 31(1)  |
| C(73)  | 7635(5)  | 3551(3) | 7624(2) | 44(1)  |
| C(83)  | 7381(6)  | 2722(3) | 7809(3) | 67(2)  |
| C(93)  | 6885(5)  | 4114(3) | 8022(2) | 58(1)  |
| C(103) | 12127(4) | 3602(3) | 6583(2) | 39(1)  |
| C(113) | 12247(6) | 4318(3) | 6201(2) | 61(2)  |
| C(123) | 13546(5) | 3236(4) | 6736(3) | 73(2)  |
| S(14)  | 10524(1) | 1173(1) | 6692(1) | 39(1)  |
| O(14)  | 9168(3)  | 1453(2) | 6830(2) | 52(1)  |
| O(24)  | 11060(3) | 1786(2) | 6322(1) | 51(1)  |
| O(34)  | 10621(4) | 405(2)  | 6494(2) | 73(1)  |
| C(14)  | 11549(6) | 1215(3) | 7419(2) | 61(2)  |
| F(14)  | 12836(4) | 1065(3) | 7352(2) | 111(2) |
| F(24)  | 11463(4) | 1897(2) | 7671(2) | 101(1) |
| F(34)  | 11091(4) | 693(2)  | 7792(2) | 94(1)  |

Table S19. Bond lengths [Å] and angles [deg] for 5.

---

|                   |            |
|-------------------|------------|
| Fe(1)-N(11)       | 1.959(3)   |
| Fe(1)-N(21)       | 1.961(3)   |
| Fe(1)-O(14)       | 2.131(3)   |
| Fe(1)-O(24)       | 2.213(3)   |
| Fe(1)-S(14)       | 2.7338(12) |
| N(11)-C(21)       | 1.335(5)   |
| N(11)-C(12)       | 1.448(4)   |
| N(21)-C(41)       | 1.341(5)   |
| N(21)-C(13)       | 1.444(5)   |
| C(11)-C(81)       | 1.534(6)   |
| C(11)-C(61)       | 1.538(5)   |
| C(11)-C(71)       | 1.541(6)   |
| C(11)-C(21)       | 1.551(5)   |
| C(21)-C(31)       | 1.416(5)   |
| C(31)-C(41)       | 1.394(5)   |
| C(41)-C(51)       | 1.584(5)   |
| C(51)-C(111)      | 1.523(6)   |
| C(51)-C(91)       | 1.545(6)   |
| C(51)-C(101)      | 1.552(6)   |
| C(12)-C(62)       | 1.406(5)   |
| C(12)-C(22)       | 1.413(5)   |
| C(22)-C(32)       | 1.389(6)   |
| C(22)-C(72)       | 1.517(6)   |
| C(32)-C(42)       | 1.382(6)   |
| C(42)-C(52)       | 1.374(6)   |
| C(52)-C(62)       | 1.388(6)   |
| C(62)-C(102)      | 1.526(6)   |
| C(72)-C(82)       | 1.499(7)   |
| C(72)-C(92)       | 1.516(7)   |
| C(102)-C(122)     | 1.536(6)   |
| C(102)-C(112)     | 1.543(6)   |
| C(13)-C(23)       | 1.407(5)   |
| C(13)-C(63)       | 1.415(5)   |
| C(23)-C(33)       | 1.384(6)   |
| C(23)-C(73)       | 1.531(6)   |
| C(33)-C(43)       | 1.372(6)   |
| C(43)-C(53)       | 1.369(6)   |
| C(53)-C(63)       | 1.395(6)   |
| C(63)-C(103)      | 1.525(6)   |
| C(73)-C(83)       | 1.521(7)   |
| C(73)-C(93)       | 1.540(6)   |
| C(103)-C(113)     | 1.510(6)   |
| C(103)-C(123)     | 1.532(6)   |
| S(14)-O(34)       | 1.406(3)   |
| S(14)-O(24)       | 1.463(3)   |
| S(14)-O(14)       | 1.467(3)   |
| S(14)-C(14)       | 1.809(6)   |
| C(14)-F(14)       | 1.303(6)   |
| C(14)-F(24)       | 1.312(6)   |
| C(14)-F(34)       | 1.326(6)   |
| <br>              |            |
| N(11)-Fe(1)-N(21) | 95.56(12)  |
| N(11)-Fe(1)-O(14) | 119.57(13) |
| N(21)-Fe(1)-O(14) | 132.41(14) |
| N(11)-Fe(1)-O(24) | 122.21(12) |
| N(21)-Fe(1)-O(24) | 124.18(13) |
| O(14)-Fe(1)-O(24) | 64.40(12)  |
| N(11)-Fe(1)-S(14) | 125.90(9)  |
| N(21)-Fe(1)-S(14) | 138.34(9)  |
| O(14)-Fe(1)-S(14) | 32.17(9)   |
| O(24)-Fe(1)-S(14) | 32.28(8)   |

|                      |            |
|----------------------|------------|
| C(21)-N(11)-C(12)    | 128.7(3)   |
| C(21)-N(11)-Fe(1)    | 125.9(2)   |
| C(12)-N(11)-Fe(1)    | 105.3(2)   |
| C(41)-N(21)-C(13)    | 125.9(3)   |
| C(41)-N(21)-Fe(1)    | 124.2(3)   |
| C(13)-N(21)-Fe(1)    | 109.7(2)   |
| C(81)-C(11)-C(61)    | 106.9(3)   |
| C(81)-C(11)-C(71)    | 109.4(3)   |
| C(61)-C(11)-C(71)    | 106.0(3)   |
| C(81)-C(11)-C(21)    | 108.9(3)   |
| C(61)-C(11)-C(21)    | 117.2(3)   |
| C(71)-C(11)-C(21)    | 108.3(3)   |
| N(11)-C(21)-C(31)    | 120.0(3)   |
| N(11)-C(21)-C(11)    | 126.1(3)   |
| C(31)-C(21)-C(11)    | 113.9(3)   |
| C(41)-C(31)-C(21)    | 132.4(3)   |
| N(21)-C(41)-C(31)    | 121.9(3)   |
| N(21)-C(41)-C(51)    | 125.3(3)   |
| C(31)-C(41)-C(51)    | 112.8(3)   |
| C(111)-C(51)-C(91)   | 107.3(4)   |
| C(111)-C(51)-C(101)  | 106.2(4)   |
| C(91)-C(51)-C(101)   | 108.2(4)   |
| C(111)-C(51)-C(41)   | 118.2(3)   |
| C(91)-C(51)-C(41)    | 108.2(3)   |
| C(101)-C(51)-C(41)   | 108.4(3)   |
| C(62)-C(12)-C(22)    | 121.8(4)   |
| C(62)-C(12)-N(11)    | 118.4(3)   |
| C(22)-C(12)-N(11)    | 119.2(3)   |
| C(32)-C(22)-C(12)    | 117.5(4)   |
| C(32)-C(22)-C(72)    | 120.1(4)   |
| C(12)-C(22)-C(72)    | 122.3(4)   |
| C(42)-C(32)-C(22)    | 121.3(4)   |
| C(52)-C(42)-C(32)    | 120.1(4)   |
| C(42)-C(52)-C(62)    | 121.7(4)   |
| C(52)-C(62)-C(12)    | 117.5(4)   |
| C(52)-C(62)-C(102)   | 119.9(4)   |
| C(12)-C(62)-C(102)   | 122.5(3)   |
| C(82)-C(72)-C(92)    | 106.8(4)   |
| C(82)-C(72)-C(22)    | 113.6(4)   |
| C(92)-C(72)-C(22)    | 114.1(4)   |
| C(62)-C(102)-C(122)  | 112.2(4)   |
| C(62)-C(102)-C(112)  | 111.6(4)   |
| C(122)-C(102)-C(112) | 108.5(4)   |
| C(23)-C(13)-C(63)    | 121.3(3)   |
| C(23)-C(13)-N(21)    | 119.3(3)   |
| C(63)-C(13)-N(21)    | 119.1(3)   |
| C(33)-C(23)-C(13)    | 117.6(4)   |
| C(33)-C(23)-C(73)    | 120.5(4)   |
| C(13)-C(23)-C(73)    | 121.9(4)   |
| C(43)-C(33)-C(23)    | 121.8(4)   |
| C(33)-C(43)-C(53)    | 119.9(4)   |
| C(43)-C(53)-C(63)    | 121.8(4)   |
| C(53)-C(63)-C(13)    | 116.9(4)   |
| C(53)-C(63)-C(103)   | 120.9(4)   |
| C(13)-C(63)-C(103)   | 122.1(4)   |
| C(83)-C(73)-C(93)    | 110.4(4)   |
| C(83)-C(73)-C(23)    | 109.8(4)   |
| C(93)-C(73)-C(23)    | 113.2(4)   |
| C(113)-C(103)-C(63)  | 113.8(4)   |
| C(113)-C(103)-C(123) | 110.4(4)   |
| C(63)-C(103)-C(123)  | 113.1(4)   |
| O(34)-S(14)-O(24)    | 118.6(2)   |
| O(34)-S(14)-O(14)    | 117.7(2)   |
| O(24)-S(14)-O(14)    | 104.42(19) |
| O(34)-S(14)-C(14)    | 105.3(2)   |

|                   |            |
|-------------------|------------|
| O(24)-S(14)-C(14) | 105.4(2)   |
| O(14)-S(14)-C(14) | 103.9(2)   |
| O(34)-S(14)-Fe(1) | 137.34(17) |
| O(24)-S(14)-Fe(1) | 53.86(13)  |
| O(14)-S(14)-Fe(1) | 50.68(13)  |
| C(14)-S(14)-Fe(1) | 117.24(18) |
| S(14)-O(14)-Fe(1) | 97.15(17)  |
| S(14)-O(24)-Fe(1) | 93.86(16)  |
| F(14)-C(14)-F(24) | 109.1(5)   |
| F(14)-C(14)-F(34) | 108.4(5)   |
| F(24)-C(14)-F(34) | 108.4(5)   |
| F(14)-C(14)-S(14) | 110.7(4)   |
| F(24)-C(14)-S(14) | 111.0(4)   |
| F(34)-C(14)-S(14) | 109.2(4)   |

---

Table S20. Anisotropic displacement parameters ( $\text{Å}^2 \times 10^3$ ) for 5. The anisotropic displacement factor exponent takes the form:  $-2 \pi^2 [ h^2 a^{*2} U_{11} + \dots + 2 h k a^* b^* U_{12} ]$

|        | U11    | U22    | U33    | U23    | U13    | U12    |
|--------|--------|--------|--------|--------|--------|--------|
| Fe(1)  | 37(1)  | 24(1)  | 31(1)  | 3(1)   | -8(1)  | 6(1)   |
| N(11)  | 24(2)  | 22(2)  | 24(2)  | 0(1)   | 0(1)   | 2(1)   |
| N(21)  | 28(2)  | 24(2)  | 24(2)  | 1(1)   | -3(1)  | 1(1)   |
| C(11)  | 29(2)  | 27(2)  | 26(2)  | 2(2)   | -3(2)  | 2(2)   |
| C(21)  | 18(2)  | 27(2)  | 26(2)  | 0(2)   | 4(2)   | 1(2)   |
| C(31)  | 31(2)  | 17(2)  | 30(2)  | 3(2)   | -6(2)  | 8(2)   |
| C(41)  | 29(2)  | 24(2)  | 27(2)  | 0(2)   | 4(2)   | 1(2)   |
| C(51)  | 47(3)  | 21(2)  | 34(2)  | 1(2)   | -5(2)  | 0(2)   |
| C(61)  | 42(3)  | 38(3)  | 40(2)  | -5(2)  | -11(2) | 3(2)   |
| C(71)  | 35(3)  | 45(3)  | 43(3)  | -4(2)  | -7(2)  | 6(2)   |
| C(81)  | 53(3)  | 46(3)  | 33(2)  | 8(2)   | -4(2)  | -3(2)  |
| C(91)  | 58(3)  | 38(3)  | 52(3)  | -7(2)  | -3(2)  | 17(2)  |
| C(101) | 66(3)  | 26(2)  | 48(3)  | 3(2)   | -8(2)  | -5(2)  |
| C(111) | 58(3)  | 23(2)  | 42(3)  | -4(2)  | -11(2) | -1(2)  |
| C(12)  | 22(2)  | 26(2)  | 26(2)  | -1(2)  | -4(2)  | 1(2)   |
| C(22)  | 27(2)  | 28(2)  | 33(2)  | 5(2)   | -3(2)  | 2(2)   |
| C(32)  | 36(3)  | 25(2)  | 54(3)  | 2(2)   | -4(2)  | -4(2)  |
| C(42)  | 43(3)  | 22(2)  | 59(3)  | -8(2)  | -5(2)  | 5(2)   |
| C(52)  | 34(3)  | 38(3)  | 47(3)  | -14(2) | 2(2)   | 7(2)   |
| C(62)  | 26(2)  | 30(2)  | 31(2)  | -1(2)  | -3(2)  | 1(2)   |
| C(72)  | 42(3)  | 32(2)  | 46(3)  | -2(2)  | 13(2)  | -9(2)  |
| C(82)  | 33(3)  | 135(6) | 67(4)  | 4(4)   | 6(3)   | 9(3)   |
| C(92)  | 49(4)  | 200(9) | 60(4)  | 36(5)  | 12(3)  | 1(4)   |
| C(102) | 33(2)  | 40(2)  | 37(2)  | -8(2)  | 11(2)  | -3(2)  |
| C(112) | 50(3)  | 61(3)  | 43(3)  | 3(2)   | 7(2)   | 0(2)   |
| C(122) | 32(3)  | 87(4)  | 51(3)  | 9(3)   | 3(2)   | -14(3) |
| C(13)  | 32(2)  | 23(2)  | 26(2)  | 5(2)   | -5(2)  | 2(2)   |
| C(23)  | 37(2)  | 32(2)  | 31(2)  | 3(2)   | 2(2)   | 4(2)   |
| C(33)  | 60(3)  | 54(3)  | 23(2)  | 2(2)   | 3(2)   | 3(3)   |
| C(43)  | 49(3)  | 53(3)  | 31(2)  | 2(2)   | -13(2) | 0(2)   |
| C(53)  | 32(2)  | 44(3)  | 45(3)  | 6(2)   | -7(2)  | -1(2)  |
| C(63)  | 32(2)  | 25(2)  | 35(2)  | 7(2)   | -2(2)  | -5(2)  |
| C(73)  | 38(3)  | 55(3)  | 40(3)  | 2(2)   | 10(2)  | -1(2)  |
| C(83)  | 64(4)  | 59(4)  | 85(4)  | -9(3)  | 36(3)  | -13(3) |
| C(93)  | 52(3)  | 61(3)  | 64(4)  | -1(3)  | 20(3)  | 1(3)   |
| C(103) | 35(3)  | 37(2)  | 44(3)  | 0(2)   | 5(2)   | -3(2)  |
| C(113) | 78(4)  | 52(3)  | 60(3)  | 12(3)  | 31(3)  | 3(3)   |
| C(123) | 51(3)  | 102(5) | 69(4)  | 23(4)  | 22(3)  | 26(3)  |
| S(14)  | 48(1)  | 30(1)  | 38(1)  | 6(1)   | 1(1)   | 9(1)   |
| O(14)  | 45(2)  | 49(2)  | 61(2)  | 17(2)  | 6(2)   | 12(2)  |
| O(24)  | 54(2)  | 51(2)  | 49(2)  | 15(2)  | 10(2)  | 8(2)   |
| O(34)  | 116(3) | 29(2)  | 71(3)  | -3(2)  | -2(2)  | 24(2)  |
| C(14)  | 76(4)  | 51(3)  | 52(3)  | 14(3)  | -9(3)  | 14(3)  |
| F(14)  | 52(2)  | 141(4) | 132(3) | 33(3)  | -29(2) | 22(2)  |
| F(24)  | 152(4) | 71(2)  | 69(2)  | -9(2)  | -46(2) | 12(2)  |
| F(34)  | 137(3) | 90(3)  | 53(2)  | 36(2)  | -1(2)  | 12(2)  |

Table S21. Hydrogen coordinates ( $\times 10^4$ ) and isotropic displacement parameters ( $\text{Å}^2 \times 10^3$ ) for 5.

|        | x     | y    | z    | U(eq) |
|--------|-------|------|------|-------|
| H(31A) | 7053  | 4353 | 5503 | 32    |
| H(61A) | 6679  | 2359 | 4281 | 61    |
| H(61B) | 5210  | 2688 | 4081 | 61    |
| H(61C) | 5456  | 2195 | 4679 | 61    |
| H(71A) | 4993  | 4066 | 5235 | 62    |
| H(71B) | 4448  | 3216 | 5250 | 62    |
| H(71C) | 4203  | 3705 | 4650 | 62    |
| H(81A) | 7612  | 3707 | 4223 | 67    |
| H(81B) | 6908  | 4377 | 4557 | 67    |
| H(81C) | 6102  | 3955 | 4005 | 67    |
| H(91A) | 6861  | 5771 | 6588 | 75    |
| H(91B) | 6626  | 4935 | 6830 | 75    |
| H(91C) | 6269  | 5128 | 6137 | 75    |
| H(10A) | 8735  | 6009 | 5877 | 71    |
| H(10B) | 8071  | 5358 | 5452 | 71    |
| H(10C) | 9635  | 5316 | 5687 | 71    |
| H(11A) | 9222  | 5847 | 6936 | 63    |
| H(11B) | 10272 | 5192 | 6815 | 63    |
| H(11C) | 9133  | 5045 | 7260 | 63    |
| H(32A) | 6488  | 130  | 5428 | 47    |
| H(42A) | 8107  | -190 | 4772 | 50    |
| H(52A) | 9507  | 739  | 4421 | 48    |
| H(72A) | 5831  | 2027 | 5965 | 48    |
| H(82A) | 4229  | 1495 | 5236 | 117   |
| H(82B) | 3721  | 1452 | 5891 | 117   |
| H(82C) | 4307  | 713  | 5596 | 117   |
| H(92A) | 6874  | 1221 | 6727 | 154   |
| H(92B) | 5891  | 548  | 6493 | 154   |
| H(92C) | 5285  | 1290 | 6776 | 154   |
| H(10D) | 9489  | 2749 | 4785 | 43    |
| H(11D) | 8567  | 2391 | 3794 | 76    |
| H(11E) | 9769  | 1799 | 3750 | 76    |
| H(11F) | 10082 | 2686 | 3776 | 76    |
| H(12A) | 11404 | 2074 | 5249 | 85    |
| H(12B) | 11800 | 2495 | 4659 | 85    |
| H(12C) | 11515 | 1605 | 4646 | 85    |
| H(33A) | 9510  | 3840 | 8552 | 55    |
| H(43A) | 11831 | 4067 | 8600 | 55    |
| H(53A) | 12985 | 3925 | 7746 | 49    |
| H(73A) | 7246  | 3616 | 7200 | 52    |
| H(83A) | 7839  | 2378 | 7552 | 101   |
| H(83B) | 6411  | 2618 | 7766 | 101   |
| H(83C) | 7733  | 2646 | 8227 | 101   |
| H(93A) | 5921  | 3993 | 7990 | 87    |
| H(93B) | 7011  | 4633 | 7885 | 87    |
| H(93C) | 7256  | 4067 | 8440 | 87    |
| H(10E) | 11591 | 3230 | 6323 | 47    |
| H(11G) | 11349 | 4536 | 6103 | 92    |
| H(11H) | 12644 | 4187 | 5831 | 92    |
| H(11I) | 12823 | 4688 | 6426 | 92    |
| H(12D) | 13452 | 2775 | 6970 | 109   |
| H(12E) | 14132 | 3594 | 6969 | 109   |
| H(12F) | 13944 | 3111 | 6365 | 109   |
